## 1 **On the origin of photoperiod non-responsiveness in barley**

2 Rajiv Sharma<sup>1,2\*</sup>, Salar Shaaf<sup>1,3</sup>, Kerstin Neumann<sup>1</sup>, Yu Go<sup>1</sup>, Martin Mascher<sup>1,4</sup>, Michal David<sup>5</sup>,  
3 Adnan Al-Yassin<sup>6,7</sup>, Hakan Özkan<sup>8</sup>, Tom Blake<sup>9</sup>, Sarel Hübner<sup>10</sup>, Nora P. Castañeda-  
4 Álvarez<sup>11</sup>, Stefania Grandó<sup>6,12</sup>, Salvatore Ceccarelli<sup>6,12</sup>, Michael Baum<sup>6</sup>, Andreas Graner<sup>1</sup>,  
5 George Coupland<sup>13</sup>, Klaus Pillen<sup>14</sup>, Ehud Weiss<sup>5</sup>, Ian J Mackay<sup>2</sup>, Wayne Powell<sup>2</sup>, Benjamin  
6 Kilian<sup>1,11\*</sup>

7 <sup>1</sup>Genebank Department, Leibniz Institute of Plant Genetics and Crop Research (IPK), 06466  
8 Gatersleben, **Germany**

9 <sup>2</sup>Scotland's Rural College (SRUC), Edinburgh, EH93JG, **UK**

10 <sup>3</sup>Department of Agronomy and Plant Breeding, College of Agriculture and Natural Resources,  
11 Islamic Azad University, Sanandaj branch, 66169 Sanandaj, **Iran**

12 <sup>4</sup>German Centre for Integrative Biodiversity Research (iDiv) Halle-Jena-Leipzig, Leipzig,  
13 **Germany**

14 <sup>5</sup>The Martin (Szusz) Department of Land of Israel Studies and Archaeology, Bar Ilan  
15 University, Ramat-Gan, 5290002, **Israel**

16 <sup>6</sup>The International Center for Agricultural Research in the Dry Areas - ICARDA, **Lebanon**

17 <sup>7</sup>National Agricultural Research Center (NARC), Amman, **Lebanon**

18 <sup>8</sup>Department of Field Crops, Faculty of Agriculture, University of Çukurova, 01330, Adana,  
19 **Turkey**

20 <sup>9</sup>Department of Plant Sciences & Plant Pathology, Montana State University, Montana, **USA**

21 <sup>10</sup>Galilee Research Institute (MIGAL), Tel-Hai College, 12210 Upper Galilee, **Israel**

22 <sup>11</sup>Global Crop Diversity Trust, 53113 Bonn, **Germany**

23 <sup>12</sup>Freelance consultant, **Italy**

24 <sup>13</sup>Department of Plant Developmental Biology, Max Planck Institute for Plant Breeding  
25 Research, 50829 Cologne, **Germany**

26 <sup>14</sup>Institute of Agricultural and Nutritional Sciences, Martin-Luther-University Halle-  
27 Wittenberg, 06120 Halle/Saale, **Germany**

28 **\*Correspondence:**

29 Rajiv Sharma: [Rajiv.Sharma@sruc.ac.uk](mailto:Rajiv.Sharma@sruc.ac.uk)

30 Benjamin Kilian: [benjamin.kilian@cropptrust.org](mailto:benjamin.kilian@cropptrust.org)

## 31 **Abstract**

32 In barley, the transition from the vegetative to reproductive phase is complex and under the  
33 control of photoperiodic and temperature conditions. One major gene involved is *PPD-H1*, a  
34 *PSEUDO-RESPONSE REGULATOR 7 (PRR7)* that encodes a component of the circadian  
35 clock. Mutation at *PPD-H1* resulted in the photoperiod non-responsive *ppd-H1* alleles that are  
36 beneficial under high latitudinal environments as they allow vegetative growth during the long-  
37 day summer conditions whereby higher yields are harvested by farmers. Utilizing a diverse  
38 GWAS panel of world-wide origin and a genome-wide gene-based set of 50K SNP markers, a  
39 strong association of days to heading with the *PPD-H1* gene was detected in multi-location  
40 field trials. Re-sequencing of the gene spanning putative causative SNPs, SNP22 (Turner et al.  
41 2005) and SNP48 (Jones et al. 2008), detected recombination between the two, previously  
42 reported to be in complete LD. Phenotyping of the recombinants and phylogenetic relationships  
43 among haplotypes supported the original conclusion of Turner et al. (2005) that SNP22, present  
44 in the CCT domain, is the most likely causative SNP. To infer the origin of non-responsiveness,  
45 the *PPD-H1* gene was re-sequenced in a geo-referenced collection of 2057 wild and  
46 domesticated barleys and compared with the allelic status of the 6000-year-old barley sample  
47 from the Yoram cave in the Masada cliff. A monophyletic and post-domestication origin in the  
48 Fertile Crescent was found in contrast to the pre-domestication origin proposed by Jones et al.  
49 (2008). We show that the photoperiod non-responsiveness originated from Desert type wild  
50 barley in the Southern Levant.

51 **Key words:** allele mining, ancient DNA, crop wild relatives, domestication history, Fertile  
52 Crescent, genetic diversity, growth habit, haplotype, *Hordeum*, Israel, plant genetic resources,  
53 Southern Levant

## 54 **Introduction**

55 Variation in days to heading affects vegetative growth, the source-sink relation and ultimately  
56 determines the yield of the crop. Thus, understanding its genetic architecture is important.  
57 Heading date is influenced by various environmental cues. Among them, temperature and  
58 photoperiod are the two most important in temperate cereals (McMaster and Moragues 2019).  
59 Barley (*Hordeum vulgare* L.), the fourth most important crop, has been traditionally classified

60 as a long-day plant. The species flowers in (early) spring in the Fertile Crescent and during long  
61 summer days in north Europe.

62 Barley is one of the oldest crops and was domesticated in the Fertile Crescent (Harlan and de  
63 Wet 1971; Zohary et al. 2013). Wild barley grains have been found in large amounts at the  
64 Ohalo II archaeological site on the shore of the Sea of Galilee and were dated to 23,000 years  
65 BP (Piperno et al. 2004; Weiss et al. 2004; Snir et al. 2015). This suggests that wild barley was  
66 collected from nature long before its domestication. Archaeological data at this site also suggest  
67 pre-domestication cultivation and provide evidence that domestication was sometimes not  
68 successful (Piperno et al. 2014; Snir et al. 2015). More recent evidence showed that the non-  
69 brittle rachis phenotype of domesticated barley originated at least twice, spatially and  
70 temporally independent, in the Southern (*btr1*-type) and Northern (*btr2*-type) Levant  
71 (Pourkheirandish et al. 2015). The ancient DNA (aDNA) sequencing of 6000-year-old barley  
72 grains from the Yoram Cave in the Masada Cliff, is consistent with the origin of barley  
73 domestication in the Southern Levant (Mascher et al. 2016).

74 Migration of the crop outside the Fertile Crescent required adaptation to different environmental  
75 conditions (von Bothmer et al. 2003). Present-day barleys are grown in diverse climatic  
76 conditions from Scandinavian countries in Northern Europe to the Sub-Saharan desert in Africa  
77 and in temperate regions of the Americas and Asia (Dawson et al. 2015), which makes it an  
78 important crop for adaptation under a changing climate in the 21<sup>st</sup> century.

79 In barley, the transition from the vegetative to reproductive phase is complex (Comadran et al.  
80 2012). Recent knowledge for key flowering genes pathways involved has been reviewed for  
81 cereals by Steffan et al. (2014) and Monteagudo et al. (2019). Two major genes involved in  
82 photoperiod response have been identified and characterized in barley: *PHOTOPERIOD-H1*,  
83 *PPD-H1* on chromosome 2H (Turner et al. 2005) and *PHOTOPERIOD-H2*, *PPD-H2* on  
84 chromosome 1H (Kikuchi et al. 2011).

85 *PPD-H1*, is a *PSEUDO-RESPONSE REGULATOR 7 (PRR7)* gene that encodes a component

86 of the circadian clock (Turner et al. 2005) promoting flowering in both winter- and spring-sown  
87 conditions. Photoperiod non-responsive allele(s) (*ppd-H1*) are beneficial under high latitudinal  
88 environments as they allow vegetative growth during the long-day spring and summer growth  
89 conditions, whereby higher yields are harvested by farmers.

90 The gene was cloned by Turner et al. (2005) using a winter x spring mapping population. *PPD-*  
91 *H1* consists of 676 amino acids and two major conserved domains described as pseudo-receiver  
92 and a CCT (CONSTANS, CONSTANS-like and TOC1).

93 The wild-type, dominant and photoperiod responsive allele(s) (*Ppd-H1*) at *PPD-H1* accelerate  
94 flowering by upregulating *VRN-H3* (*HvFT1*), which is mediated by the activity of CONSTANS  
95 (Turner et al. 2005; Campoli et al. 2012). Mutation of *Ppd-H1* resulted in the recessive and  
96 photoperiod non-responsive *ppd-H1* allele (Takahashi et al. 1963; Turner et al. 2005).

97 Two diagnostic single nucleotide polymorphisms (SNPs) differentiating between sensitivity  
98 (photoperiod responsive) and insensitivity (photoperiod non-responsive) to long days have been  
99 published: Turner et al. (2005) provided strong evidence for a causative SNP in the CCT domain  
100 (SNP22), while Jones et al. (2008) described a SNP in exon 6 (SNP48). Re-sequencing different  
101 sets of wild and cultivated barleys gave contradictory results. In Turner et al. (2005) and  
102 Cockram et al. (2007), the photoperiod non-responsive allele (*ppd-H1*) was not found in wild  
103 barley. Thus, the authors concluded that a natural mutation occurred *post-domestication* during  
104 the spread of barley cultivation in Europe. Subsequently, Jones et al. (2008) found three non-  
105 responsive haplotypes within *wild* barleys from Israel and four non-responsive haplotypes  
106 within *wild* barleys from Iran concluding that (I) the non-responsive phenotype of European  
107 landraces originated in wild barley from Iran; and (II) that the impact of wild barley from Iran  
108 was significant for the domestication history of European barley. However, these results were  
109 based on a relatively small sample of potentially admixed wild barleys of genebank origins  
110 (Jakob et al. 2014). These non-responsive *wild* barleys were from *east of the Fertile Crescent*,  
111 and earlier studies had reported they contributed little to present day European barleys (Kilian

112 et al. 2006; Morrell et al 2007).

113 In this paper we study the origin and domestication history of photoperiod non-responsiveness  
114 (*ppd-H1*) in barley. We first performed Genome-Wide Association Studies (GWAS) of days to  
115 heading (Hd) scored in multi-location field trials in a diverse panel of genotypes of worldwide  
116 origin. We then re-sequenced the potentially causative genomic region at *PPD-H1* in a  
117 comprehensive geo-referenced collection of wild and domesticated barley. Additionally, we  
118 used relationships among haplotypes, bioclimatic and phenotypic data, and comparison with  
119 the allelic status of the ancient 6000 years old barley sample from the Yoram cave.

## 120 **Materials and methods**

### 121 **The Genome-wide association study panel (GWAS panel)**

122 The diverse spring barley association panel consisted of 127 two-rowed and 97 six-rowed  
123 barley genotypes of world-wide origin (Haseneyer et al. 2010; Pasam et al. 2012). One-  
124 hundred-and nine genotypes originated from Europe, 45 from West Asia and North Africa  
125 (WANA), 40 from East Asia and 30 from the Americas (Table S1). The panel has been  
126 successfully utilized in other GWAS for agronomic traits, salt tolerance, drought-stress and  
127 candidate gene-based re-sequencing studies (e.g. Stracke et al. 2009; Long et al. 2013; Alqudah  
128 et al. 2014, Comadran et al. 2012; Abdel-Ghani et al. 2019).

### 129 **Multi-location field trials (GWAS panel)**

130 Days to heading (Hd) was scored in multi-location field trials; four locations in Germany, and  
131 one each in USA, Turkey and Syria (Table S2). As the locations were diverse, we treated the  
132 four Germany trials as a single location in the GWAS. Hd was scored as days from the date of  
133 sowing until 50 percent of the plants had reached growth stage @GS53 (Lancashire et al. 1991).  
134 Experimental design and further details are provided in Table S2 and in Supplementary  
135 Information online.

## 136 **Markers for GWAS analysis**

137 The GWAS panel was genotyped at TraitGenetics GmbH Gatersleben, Germany using the high  
138 throughput 50k iSelect SNP chip consisting of 43,461 SNPs (Bayer et al. 2017). All allele calls  
139 were manually inspected using GENOMESTUDIO Genotyping Module v2.0.2 (Illumina, San  
140 Diego, California). SNPs with more than 10 percent of missing values and > 10% heterozygous  
141 calls were excluded. A set of 37,387 SNPs ( $\geq 0.05$  minor allele frequency) were used for GWAS.  
142 SNPs were anchored to the barley reference genome “Morex” assembly (Mascher et al. 2017).  
143 Analysis details on the genome-wide association and Site X SNP interaction are provided in  
144 Supplementary Information online.

## 145 **Geo-referenced Diversity panel for allele mining and phylogenetic analysis**

146 A comprehensive geo-referenced collection (Diversity panel) of 2195 wild and domesticated  
147 barley genotypes, from more than one hundred countries, was established to investigate the  
148 origin of photoperiod non-responsiveness (*ppd-H1*) in barley. This collection comprises a  
149 targeted selection of genotypes described in several publications (Badr et al. 2000; Kilian et al.  
150 2006; Morrell et al. 2007; Jones et al. 2008; Comadran et al. 2012; Pasam et al. 2012, 2014;  
151 Tondelli et al. 2013; Jakob et al. 2014; Pourkheirandish et al. 2015; Russell et al. 2016; Xu et  
152 al. 2018; Bustos-Korts et al. 2019), extended by newly collected wild barleys i.e. from Israel  
153 and Turkey. All germplasm materials were single seed descended (SSD) for at least two  
154 generations and spikes were carefully isolated. Based on morphological and taxonomical  
155 characterization under field conditions in Germany, 138 samples were not considered for allele  
156 mining (Table S3).

157 For re-sequencing, we considered in total 2057 genotypes (Fig. S4) comprising (i) 942 wild  
158 barleys (*Hordeum vulgare* L. ssp. *spontaneum* (C. Koch) Thell., *H. spontaneum*) representing  
159 the immediate progenitor of domesticated barleys; (ii) 1110 domesticated genotypes (*Hordeum*  
160 *vulgare* L. ssp. *vulgare*) including 433 landraces from 58 countries, 673 cultivars from 54

161 countries and 4 others); and (iii) five feral *H. agriocrithon*. (Table S4); Supplementary  
162 Information online).

### 163 **DNA Amplification and re-sequencing at *PPD-HI***

164 Genomic DNA was isolated from single leaves of 2057 SSD-derived genotypes with the Qiagen  
165 DNeasy Plant Mini Kit (Qiagen, Hilden, Germany), according to the manufacturer's  
166 instructions. The GWAS panel was re-sequenced using two primer combinations. A 1367 bp  
167 fragment was considered for analysis. The Diversity panel was re-sequenced using one primer  
168 combination only. After trimming, a fragment of 898 bp was considered for multiple sequence  
169 alignments. All details are provided in Supplementary Information online.

### 170 **Sequence analysis at *PPD-HI***

171 PCR products were purified by NucleoFast 96 PCR plates (Macherey-Nagel, Germany) and  
172 were sequenced directly on both DNA strands on Applied Biosystems (Weiterstadt, Germany)  
173 ABI Prism 3730xL sequencer using BigDye terminators. DNA sequences were processed with  
174 ABI DNA SEQUENCING ANALYSIS SOFTWARE 5.2 and later manually edited by BIOEDIT 7.2.5  
175 (Hall 1999). Multiple sequence alignments were generated using the *PPD-HI* sequence of  
176 cultivar Igri as reference (AY970701, Turner et al. 2005).

177 Haplotypes were defined using DNASP v. 5.10.01 (Librado and Rozas 2009). Singleton  
178 haplotypes were confirmed by three independent amplifications and re-sequencing.

179 Sequence diversity statistics was calculated using DNASP. Diversity-loss, for the total number  
180 of sites ( $L\pi_{\text{Total}}$ ), and for silent sites ( $L\pi_{\text{silent}}$ ) was calculated by:  $L\pi = 1 - (\pi_{\text{domesticated}}/\pi_{\text{wild}})$   
181 (Tenaillon et al 2004).

182 Median-Joining (MJ) networks (Bandelt et al. 1999) were constructed using DNA ALIGNMENT  
183 1.3.3.2 and NETWORK 5.0.0.1 (Fluxus Technology Ltd., Clare, Suffolk, UK). SPLITSTREE4  
184 version 4.15.1 was used to generate a NeighborNet planar graph of haplotypes based on the un-  
185 corrected P distances (Hudson and Bryant 2006).



186 **Geographical distribution maps**

187 All maps were prepared using QGIS (<https://qgis.org>), a free and open source Geographic  
188 Information System (GIS) software. All details are provided in Supplementary Information  
189 online.

190 **Experiments to characterize photoperiod responsive and non-responsive genotypes**

191 *Hd of the GWAS panel under controlled long and short-day conditions*

192 To confirm that haplotype H10 is truly photoperiod responsive, the phenotypic response to  
193 daylength (in days to heading) was tested for 41 selected genotypes including (i) 33 photoperiod  
194 responsive and non-responsive genotypes of the GWAS panel, and (ii) eight wild and one  
195 domesticated barley from the Diversity panel harboring mainly haplotype H10. The tested panel  
196 comprised a total of 10 different haplotypes of *PPD-H1* (Table S4; Supplementary Information  
197 online.

198 *Contrasting the development of photoperiod responsive and non-responsive genotypes*

199 Data published by Alqudah et al. (2014) was explored for this analysis wherein the panel was  
200 phenotyped at four developmental stages under inductive long day conditions in the  
201 greenhouse. Thermal time was measured as Growing Degree Days (GDD) from sowing to awn-  
202 primordium, tipping, heading and anther extrusion stages. The 218 genotypes and their  
203 haplotypes considered for this study are shown in Table S4.

204 *Heading date under vernalized and non-vernalized long-day field conditions*

205 This experiment was designed to characterize the growth habit and photoperiod responsiveness  
206 of genotypes under contrasting vernalization treatments and long-term conditions. In total, 843  
207 wild and domesticated barley genotypes from the Diversity panel were studied in the field at  
208 IPK under vernalized and non-vernalized conditions (Table S4; Supplementary Information  
209 online.



210 **Inferring the allelic states of *PPD-H1* and *HvCEN* in the 6000 years old ancient barley**  
211 **sample JK3014 from the Yoram Cave**

212 Ancient barley sequences (Mascher et al. 2016) were retrieved from the short-read archive  
213 accession (PRJEB12197) (<https://www.ebi.ac.uk/ena/data/view/PRJEB12197>). After adaptor  
214 removal and merging of overlapping paired-end sequences with LEEHOM (Renaud et al. 2014),  
215 merged reads with a minimum length of 30 bp were mapped to the barley reference genome  
216 (version: MorexV2, Monat et al. 2019) using BWA-MEM. Variants (SNP and short indels)  
217 were called from uniquely mapped reads (MAPQ  $\geq$  20) using BCFTOOLS (Li et al. 2011). The  
218 genotype calls were filtered using the following criteria: (i) the minimum reads depth was 1 for  
219 homozygous calls, and (ii) the minimum reads depth was 2 in both alleles for heterozygous  
220 calls. *PPD-H1* and *HvCEN* sequences (Comadran et al. 2012) were aligned to the MorexV2  
221 assembly BLAST (Altschul et al. 1990). Based on the alignment result, we obtained the relative  
222 position in MorexV2 for the previously reported variants of *PPD-H1* (Turner et al. 2005) and  
223 *HvCEN*, and retrieved the genotype calls at these sites from our variant calling file.

224 **Analysis of Environmental Data**

225 In order to investigate and compare the sampling sites of wild, landrace and the ancient barley,  
226 19 GIS-derived historical bioclimatic variables (mean value from 1950-2000) with a spatial  
227 resolution of 2.5-min (5 km) were extracted from [www.worldclim.org](http://www.worldclim.org) using the R package  
228 raster v.3.0-7 (Hijmans et al. 2005). Data was analysed in R (R core team 2018). See  
229 Supplementary Information online.

230 **Results**

231 ***Phenotypic data evaluation for the GWAS panel***

232 Large variation was observed for Hd in the diverse GWAS panel across the multi-location field  
233 trials (Fig. 1). The trials in Germany showed the largest, and in the USA the smallest variation

234 (Fig. 1; Table S5). The coefficient of variation was high ( $>4.93$ ) for all trials, reflecting the  
235 diversity of the phenotype at each location. Heritability values were moderate to high (0.66 –  
236 0.99; Table S5). We observed significant ( $P < 0.001$ , except USA vs. Turkey) and positive  
237 correlations between all pairwise Hd phenotypes (Table S6). The geographically closest  
238 locations in Syria and Turkey showed the highest correlations followed by Syria and Germany;  
239 while correlations with the USA were the smallest.

#### 240 ***Multi-location heading date associations***

241 A total of 296 SNPs across all sites displayed significant associations ( $-\log_{10}P \geq 4.0$ ) for Hd  
242 (Table S7). Most significant regions showed associations with more than one SNP, indicative  
243 of the high SNP density and linkage disequilibrium (LD) of the genomic regions detected in the  
244 analysis (Fig. 2; Table S7). Despite diverse locations of our trials, major peaks were colocalized  
245 near genes like *PPD-H1*, *HvCEN*, *VrnH2* and *FT1*. Interestingly, the *PPD-H1* region was not  
246 significantly associated for the Montana/USA experiment, which is in agreement with its low  
247 pair-wise correlations with the other field sites (Table S6).

248 Five SNPs at *PPD-H1* showed the highest association for the trials in Germany with significant  
249 values up to  $-\log_{10}P = 6.39$  (Table S7). Association at this region reduces days to heading (Hd)  
250 by up to 4.15 days. Further, additional SNPs located on chromosome 2H close to *PPD-H1* were  
251 significantly associated indicating the extended LD of the *PpdH1* region (Table S7). SNP48  
252 and SNP22 were analyzed and both were significant with  $-\log_{10}P = 6.21$  which is similar as the  
253 highest associated SNPs on the 50K SNP chip (BOPA2\_12\_30872 and JHI-Hv50k-2016-  
254 73417) (Table S7 and Fig. 3a). Highest associated SNPs were from the intronic region at *PpdH1*  
255 (intron 3) and thus less likely to be causative compared to SNP22 and SNP48. Within the 177  
256 accessions for which complete data sets across all locations were available (Table S1), SNP22  
257 and SNP48 were in complete LD ( $r = 1$ ). However, in the full GWAS panel (224 accessions)  
258 these SNPs remained in nearly perfect LD with  $r = 0.9817$  as also observed by Turner et al.

259 (2005) and Jones et al. (2008). SNP22 and SNP48 showed highly significant differences in Hd  
260 in Germany compared to Turkey and Syria (Fig. S1). Non-responsive genotypes flowered late  
261 compared to responsive types. This could be explained by longer day lengths at higher latitudes  
262 in Germany compared to other sites (Table S2).

### 263 ***Multi-location heading date - SNP interaction***

264 From the significantly associated 258 non-redundant SNPs, 59% (N=153) showed a significant  
265 interaction with sites ( $P \leq 0.05$  “p (Site x SNP)”), and 19% (N=51) had a significant interaction  
266 with Bonferroni corrected value of 0.05 (Table S8). For 35% (N=54) of significantly interacting  
267 SNPs, the relative magnitudes of the interaction and main effects caused the net effect of the  
268 SNP on Hd to reverse between at least one pair of sites. For example, the effect on Hd of SNP  
269 JHI-Hv50k-2016-73562 near the *PPD-H1* region was predicted as -3.075 days in Germany but  
270 +0.739 days in Turkey suggesting contrasting effects of alleles in varying environments (Table  
271 9).

### 272 ***Haplotype diversity at PPD-H1 in the GWAS panel***

273 The GWAS panel harbored 14 haplotypes (H) (Fig. 3b). Except for genotypes of European  
274 origin, which comprised mostly non-responsive haplotypes, no geographical cline in haplotype  
275 frequencies was found, suggesting non-responsiveness was selected in European barleys to  
276 allow vegetative growth under long-day conditions (Table S4). The most prevalent haplotypes  
277 in the panel were haplotype H2 (36%) and H1 (22%). Most European barleys carried haplotype  
278 H2 (65%) and haplotype H1 (24%) (Table S10). Barleys from WANA carried in total 11  
279 haplotypes, with intermediate to low frequencies. Frequent haplotypes within American barleys  
280 were haplotype H1 (34%) and H8 (25%), while haplotype H6b was predominant in East Asia  
281 (23%). Six haplotypes were region-specific (Table S10).

282 Photoperiod non-responsive haplotypes should carry nucleotide T at both positions, at SNP22  
283 and at SNP48, compared to the cultivar Igri as detected by Turner et al. (2005). Three

284 haplotypes (H1, H2, H56) carried nucleotide T at both positions. Interestingly, haplotype H10  
285 carried T at SNP48 but G at SNP22 and was found in two cultivars (BCC533 and BCC759,  
286 from Nepal and India, respectively) (Fig. 3b; Fig. S2; Table S4).

287 To ascertain whether these two genotypes are photoperiod responsive or non-responsive, both  
288 were grown together with 39 further genotypes from the Diversity panel under long and short  
289 day conditions. For Hd under long and short-day conditions, repeatability was high with 0.98  
290 and 0.91, respectively. While there was no difference among the haplotypes in short day  
291 condition, under long days a clear effect was observed. The seven genotypes carrying H10 were  
292 found to be photoperiod responsive (Fig. 4), as haplotype H10 reached heading date  
293 significantly earlier than its derived haplotype H1 under long day conditions ( $p < 0.001$ , 22 days  
294 earlier), while under short days, the observed difference of 3.8 days was not significant. This  
295 demonstrates that haplotype H10 is photoperiod responsive and concludes SNP22 as the most  
296 likely causative SNP. Supporting our findings, both domesticated H10-genotypes of the GWAS  
297 panel were early under long day conditions from the tipping until the anther extrusion stage in  
298 the study of Alqudah et al. (2014) (Fig. S3). Accordingly, these two genotypes headed also  
299 earlier than the non-responsive genotypes of the GWAS panel in field trials in Germany (across  
300 four locations and two years), corroborating that haplotype H10 is indeed photoperiod  
301 responsive. Therefore, our data strongly suggest that SNP22 located in the CCT domain is the  
302 causal SNP.

### 303 ***Genetic diversity at PPD-H1 within the Diversity panel***

304 We detected ninety haplotypes in 2057 re-sequenced and taxonomically confirmed SSD-  
305 derived genotypes (Fig. 5; Figs. S4, S5; Table S13). Higher diversity was found in wild than in  
306 domesticated barleys: 71 haplotypes in wild and 27 in domesticated barleys (23 haplotypes in  
307 landraces and 17 in cultivars). Eight haplotypes were shared between domesticated and wild  
308 barleys. 17 haplotypes were unique to domesticated barley including the non-photoperiod

309 responsive haplotypes H1 and H2. Most haplotypes detected in wild barley had low frequencies.  
310 Only haplotypes H6 (40.44%), H4 (14.33%) and H7 (13.69%) were more frequent and were  
311 found in 68.46% of the wild barleys (Fig. 5; Table S11). These major haplotypes were not  
312 exclusive to wild barley indicating extensive post-domestication utilization.

313 Wild barleys from Israel possessed the highest genetic diversity (47 haplotypes), followed by  
314 Turkey (19 haplotypes). Several haplotypes were region-specific. Sixty-three haplotypes were  
315 unique to wild barley and not exploited in the domesticated barleys, which might harbor a key  
316 to local environment adaptation. Interestingly, several of the non-exploited haplotypes clustered  
317 together (Fig. 5; Table S11; Supplementary Information online).

318 Within domesticated barleys, the most frequent haplotypes were H1 (15%) and H2 (27%).  
319 These two haplotypes were exclusively found in domesticated barley. Haplotype H1 and its  
320 four derived haplotypes (H55, H56, H2, H47) all carried “T” at SNP22 and were considered as  
321 photoperiod non-responsive (Fig. 5; Tables S4, 13).

322 Additionally, we detected 23 haplotypes in 128 genotypes that were classified previously based  
323 on their passport data as wild barleys (Table S3; Jones et al. 2008). But careful inspection of  
324 them by growing them in the field and studying plant morphology and gene sequence data, we  
325 found that they either carrying introgressions from domesticated barley or are seed  
326 contaminants from *ex situ* maintenance and seed sharing among genebanks as also reported in  
327 Jakob et al. (2014). Thus, we classify them as admixtures and were excluded from the analysis  
328 (Supplementary Information online).

329 Interestingly, in the Diversity panel, haplotypic diversity for wild ( $H=0.79$ ) and domesticated  
330 ( $H=0.86$ ) barleys was comparable (Table S14). Nucleotide diversity ( $\pi$ ) and Waterson’s Theta  
331 ( $\theta$ ) were lower for domesticated barley than for wild barley. Differences in nucleotide diversity  
332 between wild and domesticated were larger at silent sites ( $\pi$  silent). Within the Diversity panel,  
333 59 segregating sites were found for wild barley that were monomorphic in domesticated barley.

334 By contrast, domesticated barleys carried 13 segregating sites that were monomorphic in wild  
335 material. Tajima's  $D$  was negative (-1.55) ( $P > 0.10$ ) for wild barleys but positive for  
336 domesticated barley (0.32,  $P > 0.10$ ). Only, non-synonymous sites showed significant negative  
337 Tajima  $D$  values (-1.84,  $P < 0.05$ ) in wild compared to domesticated barleys (0.93,  $P > 0.10$ )  
338 indicating the presence of rare alleles in wild compared to domesticated barleys. Further, higher  
339 Tajima's  $D$  values (non-Syn/Syn ratio) were observed for wild (3.55) compared to domesticated  
340 (3.01) barley. By comparing wild and domesticated barleys, a 32% loss of diversity ( $L\pi_{\text{silent}}$ ) at  
341 the silent sites and 9% ( $L\pi_{\text{Total}}$ ) at the total number of segregating sites was observed, indicating  
342 a relatively moderate diversity loss post-domestication.

#### 343 ***Phylogenetic relationships and geographic distribution of photoperiod responsive and non-*** 344 ***responsive haplotypes***

345 Phylogenetic relationships between 90 haplotypes were visualized using a MJ-network (Fig. 5).  
346 The central position in the MJ network is occupied by haplotype H75 carried by two wild barley  
347 genotypes from Israel (Shilat) located on the western slopes of the Judea mountain ridge. This  
348 region was previously identified as a hybrid zone between the Desert and Coast wild barley  
349 ecotypes (Hübner et al. 2009, 2013). From here, major geographical groups of haplotypes are  
350 visible:

351 **Geographical group 1:** from H75 to H10 to all photoperiod non-responsive haplotypes:  
352 photoperiod non-responsive haplotypes (H1, H55, H56, H2, H47) were exclusively found in  
353 domesticated barley (and one *H. agriocrithon*), clustered together and originated from the  
354 photoperiod responsive haplotype H10.

355 Interestingly, haplotype H10 was found in 16 wild barleys (13x Israel, 3x Iran), two landraces  
356 (1x Turkey, 1x Nepal) and two cultivars (1x India, 1x Japan) (Table S4, Fig. S6). Among the  
357 wild barleys from Israel, 12 were collected in the south and east of Israel where the climate is  
358 dry and warm. They were characterized as Desert ecotype and showed early flowering (Hübner

359 et al. 2013). One genotype was collected in the hybrid zone between Desert and Northern  
360 ecotypes (FT138, Moledet). Most importantly, among the wild barleys from Israel were eight  
361 genotypes recently collected by Hübner et al. (2009) that provides convincing evidence that  
362 haplotype H10 exists in wild-stands in nature and that it is associated with the early flowering  
363 Desert ecotype. The remaining four genotypes from Israel were collected in the 1960s and  
364 1970s. Also, these showed truly wild characteristics and were collected approximately from the  
365 same locations as the eight genotypes by Hübner et al. (2009) (Fig. 7; Table S4). In a recent  
366 study wild barleys collected apart 28 years from Israel were shown earlier flowering phenotype  
367 another sign of natural selection iminged on wild stands of present day due to global warming  
368 (Qian et al. 2019).

369 Also among the wild genotypes harboring haplotype H10 were three genotypes from Iran,  
370 collected between 1952-1958 in the province of Khuzestan (Table S4).

371 Haplotype H10 was not found in Turkey despite extensively sampling of the entire distribution  
372 area of the species in the country (N=362). The disjunctive distribution of haplotype H10  
373 suggests similar environmental conditions at the respective collection sites.

374 The non-responsive haplotype H1 was found in domesticated genotypes mostly from Central  
375 Europe (Table S4). Haplotype H2, was mainly found in genotypes originating from North-West  
376 Europe (Fig. S4). Thus, geographical distribution differences of non-responsive and responsive  
377 haplotypes were observed (Figs. S4, S7). Interestingly, the non-responsive haplotypes H1 and  
378 H2 were also found in domesticated barley from the Fertile Crescent including in Bedouin  
379 landraces, newly collected by Hübner et al. (2009) (Supplementary Information online).

380 **Geographical group 2:** H75 -> H7 -> H8 -> H92: Haplotype H7 was found in 256 genotypes  
381 of almost equal frequency in wild (13.7%) and domesticated (11.4%) barleys. Among the wilds,  
382 haplotype H7 was found in 33.3% of wild barley from Israel and 0.6% genotypes from  
383 Gaziantep/Turkey. Also, 88 landraces predominantly collected in North Africa and the Near  
384 East harbored this haplotype. Haplotype H8 was found in 0.5% of wild barley (4x ISR, 1x CYP)



385 but in 9.2 % of domesticated barley, representing mostly landraces collected in the eastern  
386 Mediterranean. Haplotype H92 was mainly found in landraces from Algeria.

387 **Geographical group 3:** H75 -> H13 -> H4 -> H3 -> H95: Haplotype H13 was detected in 13  
388 wild and one landrace barley from Chad. Haplotype H4 represents a major haplotype and was  
389 detected in 230 genotypes (14.33% of wild and 8.55% of domesticated). Wild barleys were  
390 collected in Greece (N=1), Israel (N=54, including the Desert type barley FT143), Jordan  
391 (N=6), Lebanon (N=4), Syria (N=6) and Turkey (N=64). The remaining were 39 landraces  
392 mainly from the Fertile Crescent but also from Libya (N=3), and 56 cultivars mainly from  
393 Turkey. All wild barleys harboring haplotype H3 (N=18) were collected west of Gaziantep in  
394 Turkey (Supplementary Information online).

395 ***The 6000 years old domesticated barley sample from the Yoram cave was photoperiod***  
396 ***responsive***

397 We determined the allelic states of *PPD-H1* and *HvCEN* in the aDNA sample JK3014 extracted  
398 from barley grains found in the Judean desert and dated to 6000 years BP (Mascher et al. 2016).  
399 After aligning previously published ancient DNA sequences (sample JK3014) to the current  
400 barley reference genome sequence (MorexV2, Monat et al. 2019), the genotypes of putative  
401 causal variants in *PPD-H1* and *HvCEN* were determined (Table S15). The ancient barley  
402 carried the ancestral alleles at *PPD-H1* (photoperiod responsive, G at SNP22) and *HvCEN*  
403 ('early'-flowering, C [proline], at position 531 of Comadran et al. 2012). Multiple sequence  
404 alignment analysis concluded that JK3014 carried the following haplotypes; H4 at *PPD-H1* and  
405 IV at *HvCEN*. This haplotype combination has not been found in the comprehensive Diversity  
406 panel consisting of 2057 genotypes collected in the last 150 years. However, H4 is one of the  
407 major haplotypes of *PPD-H1* and shared by wild and domesticated barleys. Interestingly,  
408 *HvCEN* haplotype IV was not found in wild barley, it is derived from haplotype II (Comadran

409 et al. 2012). Haplotype IV was found in 21 domesticated barleys mainly from Ethiopia (N=10)  
410 but also from Turkey (N=2), Syria (N=1) and Yemen (N=1) (Table S4).

411 *Analysis of environmental data shed more light on the region of origin of photoperiod non-*  
412 *responsiveness*

413 To characterize the collection sites, bioclimate variables were clustered by employing PCA.  
414 The precipitation-related variables i.e. Bio14, Bio17, Bio12 and Bio18, were separated from  
415 the temperature-related variables (Bio1, Bio5, Bio6, Bio9, Bio10, Bio11) with PC1. With PC2,  
416 Bio4, Bio7 were separated from Bio8, Bio13 and Bio16 (Fig. S9; Fig. 6). The PC1 separated  
417 mainly collection sites of non-responsive barley carrying the haplotypes H1 and H2 from  
418 responsive barleys (other haplotypes). Most collection sites of non-responsive genotypes had  
419 higher values of the precipitation-related variables and lower values of the temperature  
420 variables (Fig. S10). Interestingly, the PC2 separated non-responsive barleys containing  
421 haplotype 2, into two groups (Fig. 6a). One group consisted mainly of landraces from Ethiopia  
422 that showed strong correlations with precipitation-related variables Bio13 and Bio16. The  
423 second group comprised 40 landraces from 19 countries including Egypt and Israel (Table S16).  
424 Especially based on the temperature-related variables (Bio1, Bio2, Bio5, Bio9 and Bio10), the  
425 collection sites of H10 containing wild barley from Israel were more closely related to the  
426 collection sites of non-responsive H1 containing domesticated barley than the collection sites  
427 of H10 wild barley from Iran (Fig. 6a-c; Table S16).

428 In general, landraces containing H1 from the Near East were collected in regions with higher  
429 precipitation (Bio12, Bio14, Bio17) than the H10 wild barley (Fig. 6b). H10 containing  
430 landraces were collected from contrasting environments. Collection sites of Desert type wild  
431 barley from the Southern Levant were positively associated with Bio1, Bio6, Bio11, and Bio15  
432 (Fig. 6c; Supplementary Information online).

433 Current environmental conditions at the collection sites of extant wild and landrace barley were  
434 compared with the collection site of the ancient Masada barley (JK3014) on the basis of  
435 pairwise Euclidean distances and bioclimatic variables. The following results were obtained  
436 (Fig. 7; Table S18): (i) the environmentally overall most similar collection site of all extant wild  
437 barley to Masada was the collection site of the wild barley population B1K-12 (Israel, Kidron  
438 stream), where all wild barley was described as Desert types (Hübner et al. 2009, 2013). The  
439 *PPD-H1* haplotypes found in this population were H6, H7, H28 and H66; and the haplotype  
440 combinations for *PPD-H1* and *HvCEN* were H66HII (FT045) and H7HII (FT047), which are  
441 photoperiod responsive and ‘early’ flowering. Most interestingly, also the closest wild barley  
442 to *btr1* was collected here (FT643, Pourkheirandish et al. (2015); and (ii) The environmentally  
443 second closest collection site, which is also the closest H10 collection site, to Masada is Almog,  
444 where FT639 (Desert type) was collected. From this we concluded that the *HvCEN* haplotype  
445 II (progenitor haplotype of IV), but also the *PPD-H1* haplotype 10 were found very close to the  
446 Masada cliff. The ecologically closest landrace collection site (with exact details in the passport  
447 data) to Masada was found in Egypt supporting Mascher et al. (2016) (Table S18;  
448 Supplementary Information online)

449 ***Vernalization requirement and phenotypic performance of genotypes containing haplotype***  
450 ***H10 under long-day field conditions***

451 Under vernalized and non-vernalized conditions, heading date of 843 genotypes of wild and  
452 domesticated barley was investigated to determine their vernalization requirement and to  
453 characterize key agronomic traits in the vernalized treatment. For all traits, the repeatability of  
454 data was high and ranged from 0.86 to 0.98.

455 In the non-vernalized treatment, 582 genotypes were heading, while the remaining 261  
456 genotypes (30%) were not flowering and therefore considered winter types. On average,  
457 heading date was reached 15 days later under non-vernalized compared to vernalized conditions

458 among the set of 582 genotypes. Interestingly, a bimodal distribution of Hd differences was  
459 observed, indicating two phenotypic groups - spring (flowering without vernalization) and  
460 facultative growth habit (flowering without vernalization but earlier when vernalized) (Fig.  
461 S8a). Of all 843 barley genotypes, 97 wild accessions did not exhibit completely wild  
462 characteristics and were excluded from subsequent analysis, leaving 746 accessions for  
463 comparison (470 wild and 276 domesticated). A total of 204 accessions were classified as  
464 spring types (including 6 wild barleys from Israel) and 305 as facultative, while 237 accessions  
465 were classified as winter types.

466 The genotypes carrying the non-responsive haplotypes H1 and H2 at *PPD-H1* were mostly  
467 spring types. In contrast, the photoperiod responsive progenitor haplotype H10 was mainly  
468 found in facultative types (wild barley from Israel, N=9; and wild barley from Iran, N=3) but  
469 also in two spring types (wild barley FT147 from Israel, landrace FT537 from Turkey) and one  
470 winter type (wild barley FT002 from Israel) (Fig. S8b). The genotypes with haplotype H10  
471 showed a short life cycle with the second earliest heading date (1. H66, 2. H10, 3. H26) and the  
472 earliest maturity date (1. H10, 2. H66, 3. H26) of all haplotypes under vernalized, long-day field  
473 conditions in Germany (Fig. S8c; Table S19), even if only wild barley was considered (Fig.  
474 S8d). In addition, the H10-containing genotypes were among the three genotypes with the  
475 shortest plant height, narrowest flag leaves, shortest main ear and narrowest main ear width  
476 (Table S19). From these data we conclude that plants containing haplotype 10 are well adapted  
477 to their local environmental conditions in the Southern Levant or in Khuzestan, and that they  
478 are characterized by facultative or even spring growth habit (Supplementary Information  
479 online).

## 480 **Discussion**

481 We present a GWAS of Hd across multi-location field trials that cover diverse latitudes and  
482 longitudes and detected significant associations at the *PPD-H1* genomic region. Using re-

483 sequencing covering causative SNPs of the *PPD-H1* gene, we found that SNP48 (Jones et al.  
484 2008) is not causal. Further, we re-sequenced the largest SSD and geo-referenced Diversity  
485 panel of barley to study *PPD-H1* diversity, phylogeny and domestication history. We arrived  
486 at the following five key findings:

### 487 **1. Adaptation of barley depends upon the environment**

488 The onset of Hd, a surrogate measurement of flowering time in crops, takes place in favorable  
489 environments. The photoperiod responsive *PPD-H1* gene triggers flowering when the day  
490 length increases. In winter barley, the vernalization responsive *Vrn-H2* gene acts as repressor  
491 of flowering, although many other gene interactions are also involved. With exposure to cold  
492 temperature, the repression gradually reduces and thus *PPD-H1* promotes flowering during the  
493 spring period. However, exposure to long photoperiod promotes early flowering in barley which  
494 carries the dominant *Ppd-H1* allele, and so reduces the vegetative growth. In higher latitudes  
495 (like in Central or Northern Europe), the photoperiod non-responsive *ppd-H1* allele enables  
496 vegetative growth during long days (spring season) and thus ensures higher yield. The GWAS  
497 analysis of multi-environment trials detected associations from genomic regions corresponding  
498 to the major flowering-time genes *Ppd-H2/HvFT3*, *PPD-H1*, *HvCEN*, *HvLUX1*, *Sdw1/denso*,  
499 *Vrn-H2*, *Vrn-H1*, *Vrn-H3/HvFT1* and *HvCO1* (Fig. 2). However, significant effects vary across  
500 sites suggesting that for adaptation plants utilize common but variable effects on flowering  
501 time, which was also indicated by significant SNP x site interactions. In a recent finding, *PpdH1*  
502 and *HvCEN* genes elucidate the Genotype x Environment pattern when grown under spring and  
503 winter-sown trials of barley (Bustos-Korts et al. 2019), as we also found in trials across the  
504 diverse latitudes (Table S8-S9). Crop plants grown under variable environments experience  
505 different photoperiod and therefore the influence of the regulator of Hd varies with the  
506 environment (Göransson et al. 2019; Afsharyan et al. 2020). For instance, our lower latitude  
507 trials (Turkey, Syria) have less annual variation in photoperiod compared to higher latitude

508 Germany where average day length increases by up to 4 hours during the spring growing season.  
509 Furthermore, temperature, humidity and soil type can also influence Hd. The environment  
510 specific associations observed in our study indicate that adjustment of Hd depends upon gene  
511 expression in each environment. Absence of major significant association at *PPD-H1* in  
512 Montana/USA could be due to the adaptation of the genotypes. In Montana, plants must  
513 withstand low temperatures and freezing during nighttime, and chilling during daytime until  
514 mid-June, followed by a terminal drought. Earlier flowering lines withstand terminal drought  
515 environments better. However, in our GWAS panel most domesticated genotypes originated  
516 from Europe and were adapted to European conditions and are photoperiod non-responsive and  
517 thereby developing more biomass. In the short Montana season, they experienced forced  
518 flowering, and this might be the reason that no major associations were found. Notwithstanding  
519 this, the small peaks that were observed in the *HvCEN*, *VrnH2* and *Vrn-H3/ HvFT1* regions and  
520 might be important for adaptation under drought conditions such as in Montana.  
521 The region near the *Vrn-H3/ HvFT1* gene showed strong peaks at three sites (Germany, Turkey,  
522 USA). This is interesting as it was reported that *HvFT1* is the central regulator where signals  
523 are perceived that promote flowering (Nitcher et al. 2013). It is not known why no association  
524 was detected in this genomic region in Syria. Either it suggests that different loci in high linkage  
525 disequilibrium (LD) but in dispersion contribute to the effects observed in our study or that  
526 contrasting alleles within the gene cause these effects which could be supported by observing  
527 late heading effects in Syria. Further study is needed to ascertain the effects from the *Vrn-H3/*  
528 *HvFT1* locus by re-sequencing the region. It has been shown recently that at least four identical  
529 copies of the *Vrn-H3/ HvFT1* gene are present in barley varieties that have spring growth habit  
530 whereas a single copy is present in most other barley varieties. Therefore, copy number  
531 variation causes huge effects on the expression of *Vrn-H3/HvFT1* (Nitcher et al. 2013) and may  
532 explain the variation seen in this region. Re-sequencing could shed more light on the observed

533 differences. As shown by Casas et al. (2011), four *HvFT1* haplotypes contributed to differences  
534 in flowering time but at the SNP level we could not ascertain the differences precisely.

535 Our findings confirm Maurer et al. (2015) and Herzig et al. (2018). Under the conditions of the  
536 field trials of Halle (Germany) and Dundee (Scotland), the photoperiod responsive wild barley  
537 alleles of *PPD-H1* studied in the barley Nested Association Mapping (NAM) population HEB-  
538 25 flowered substantially earlier than the non-responsive cultivated barley allele, respectively.

539 In a later study with selected HEB-25 lines segregating for responsive and non-responsive  
540 alleles, the early flowering effect of wild barley *Ppd-H1* alleles was verified in Dundee  
541 (Scotland), Halle (Germany) and Al-Karak (Jordan), but disappeared under field conditions in  
542 Dubai (United Arab Emirates) and Adelaide (Australia) with Hd at day lengths below 13 hours  
543 (Wiegmann et al. 2019). The drought conditions in Al-Karak lead to a positive effect of the  
544 *Ppd-H1* responsive allele on grain yield.

545 Further study is needed, but a similar effect as in Al-Karak can be expected in Israel, where the  
546 Desert type of wild barley with haplotype 10 was found. In this region, where barleys flower  
547 early (before Easter; Passover = Easter is the holyday of the barley harvest), the difference in  
548 heading date between haplotypes that respond to the photoperiod, but also between responsive  
549 and non-responsive haplotypes could be much less pronounced than in higher latitudes.

550 Interestingly, the progenitor haplotype H10 of the non-responsive haplotype H1 is associated  
551 with the Desert ecotype, which is characterized by early flowering (very early in Almog, around  
552 January, when daylength is about 10.5h) to avoid terminal drought. Adaptation to water  
553 availability is likely to have led to an orchestra of early alleles at many flowering related loci.

554 As expected, further early haplotypes were found in the Judean Desert. These haplotypes occur  
555 together in the Desert type wild barley populations and with different frequencies; e.g. (i)  
556 Yeruham: 3x H10, 2x H28; (ii) Neomi: 5x H66; (iii) Shivta: 1x H10, 2x H7, 1x H26, 1x H69;  
557 or (iv) Kidron stream: 1x H6, 1x H7, 1x H28, 1x H66 (Table S4). All these haplotypes should  
558 have similar effects on Hd in the Southern Levant. Haplotype H10 may not have any advantage



559 over other *PPD-H1* haplotypes in the region. In fact, under field conditions in Germany, all  
560 these haplotypes were the earliest for time to maturity, and with the exception of H6, also the  
561 earliest in Hd (Table S19). Most genotypes carrying these haplotypes were classified as  
562 facultative types (Fig. S8b). The climate in the Judean desert does not favor a strong  
563 vernalization requirement, and we conclude that most Desert-type wild barley has a facultative  
564 growth habit from which a spring growth habit has evolved. The only six wild barleys with  
565 spring growth habit are from Israel: FT050 (H6), FT147 (H10), FT288 (H26), FT301 (H7) and  
566 FT019 (H7), which suggests that the spring growth habit originated in the Southern Levant.  
567 Support for this hypothesis comes from Saisho et al (2011), who classified seven of 161 wild  
568 barley types as spring types, with the majority being facultative. However, no wild barley from  
569 Israel was included in their study, and the taxonomic status remains unclear, as certain taxa of  
570 hybrid origin, were included.

## 571 **2. SNP22 is the causal basis of the *ppd-H1* mutation**

572 Our GWAS results confirmed that *PPD-H1* is one of the most important genes in regulating  
573 flowering and variation as this gene causes natural diversity of barley flowering. In our study  
574 the two functional SNPs reported by Turner et al. (2005) and Jones et al. (2008) did not show  
575 differences in terms of the significance level. This is in accordance with the observed near  
576 perfect LD between these SNPs reported by Turner et al. (2005) and Jones et al. (2008).  
577 However, within just 87 genebank accessions, Jones et al. (2008) concluded that the functional  
578 SNP22 reported by Turner et al. (2005) is not the causal SNP.

579 Re-sequencing of the gene space spanning putative causative SNP22 and SNP48, we detected  
580 recombination between the two, previously reported to be in complete LD (Fig. 3). In the  
581 Diversity panel of 2057 barley accessions we found 20 (0,97%) accessions (16 wild, 4  
582 domesticated) with such recombination (haplotype H10), compared to Jones et al. (2008) who  
583 used a landrace panel of mostly European origin and found no recombination between these

584 SNPs. We show that haplotype H10 containing genotypes respond to photoperiod, which leads  
585 to early heading under long-day conditions (vernalized) compared to genotypes with non-  
586 responsive haplotypes (Fig. 4; Figs. S3, S8). Therefore, SNP22 in the CCT domain of Turner  
587 et al. (2005) should be considered as the causal basis of the *ppd-H1* mutation, which is  
588 supported by phylogenetic analysis. All photoperiod non-responsive haplotypes (H47, H2, H56,  
589 H55 and H1) clustered together in the MJ network, thus suggesting a monophyletic origin of  
590 photoperiod non-responsiveness in barley due to the G to T non-synonymous substitution at  
591 SNP22 (Fig. 5). *It is important* to note that in our study no phenotypically wild barley was found  
592 that carried a photoperiod non-responsive haplotype (*ppd-H1*). Thus, our data indicate that all  
593 extant wild barley is photoperiod responsive (*Ppd-H1*). This is supported by Baloch et al. (2013)  
594 studying wild barley from Jordan and Iran.

### 595 **3. Photoperiod non-responsiveness originated from Desert type wild barley in the** 596 **Southern Levant**

597 In total, sixteen wild barleys harboring H10 were collected from Israel and Iran (and not from  
598 the central part of the Fertile Crescent). Based on our analysis of environmental data, we show  
599 that wild barley from Israel containing H10 (N=13) grow in more similar habitats to non-  
600 responsive barley than H10 wild barley from Iran (N=3). For some of them, the haplotype of a  
601 second important flowering time gene, *HvCEN* is known from the study of Comadran et al.  
602 (2012). The following *PPD-H1* - *HvCEN* haplotype combinations were found in Israel (3x  
603 H10III, 1x H10IX) and Iran (3x H10I). This result supports the origin of European non-  
604 responsive barley from Desert type wild barley from the Southern Levant, likely carrying  
605 H10III, as haplotype III at *HvCEN* was by far the most frequent haplotype in European non-  
606 responsive spring and winter barley (Comadran et al. 2012).  
607 But how can the occurrence of wild barley from Iran with haplotype 10 be explained? We  
608 speculate that the province of Khuzestan in southwestern Iran was part of the ancient natural

609 distribution range of the species and that haplotype 10 survived the Last Glacial Maximum  
610 (LGM) about 21k years ago in the region (Jakob et al. 2014).

611 Among the four domesticated barleys harboring the haplotype H10, we found a 2-rowed, naked  
612 landrace from Turkey (FT537) that was collected by Jack Harlan in 1948. The allelic status at  
613 *HvCEN* is not known. In contrast, the haplotype combination H10I was found in (i) one landrace  
614 from Nepal (6-rowed, hulled); (ii) one cultivar from India (6-rowed, hulled); and (iii) one 2-  
615 rowed, naked cultivar from Japan (Fig. S6). These four domesticated barleys probably originate  
616 from H10I containing wild barleys from Iran. Further study is needed to investigate the  
617 contribution of wild barley from Iran to the *btr2* genepool (Pourkheirandish et al. 2015).  
618 Remains of non-brittle two-rowed barley dated to the Middle PPNB (10th century BP) were  
619 found in sites across the Fertile Crescent: Jericho (Israel, only about 10 km from the haplotype  
620 H10 collection site Almog), Tell Aswad (Syria), Jarmo (Iraq) but also Ali Kosh (Iran,  
621 Khuzestan province, where H10 wild barley was collected) (Alizadeh (2003); Zohary et al.  
622 (2013)).

#### 623 **4. No severe genetic bottleneck at the *PPD-H1* gene**

624 Often a severe genetic diversity change is observed when comparing wild and domesticated  
625 barley populations. Signatures of domestication include reduced genetic variation compared to  
626 the wild. We observed 14 haplotypes at *PPD-H1* (1376 bp fragment) within the diverse GWAS  
627 panel of world-wide origin (Table S10). Further, in the Diversity panel, we found 90 haplotypes  
628 within an 898 bp fragment (Table S11). This number of haplotypes is impressive compared to  
629 most re-sequencing studies in barley, but it is strikingly low compared to the 121 haplotypes  
630 observed in only 266 accessions (that consisted of only 72 wild barleys) by Jones et al. (2008).  
631 Theoretically, this difference could be due to the smaller fragment re-sequenced in our study  
632 (898 bp considered) compared to 3508 bp re-sequenced by Jones et al. (2008). Other reasons  
633 could be issues with SNP calling and haplotype assignment by Jones et al. (2008).

634 Comparing nucleotide diversity between wild ( $n = 942$ ) and domesticated barley ( $n = 1110$ ),  
635 we observed only a 9% loss of diversity at *PPD-H1*. This is also contrary to the findings of  
636 Jones et al. (2008) that reported a severe bottleneck and 22.5% loss of diversity within their 72  
637 wild and 194 domesticated barleys. Due to the small sample size, diversity values by Jones et  
638 al. (2008) should be noted with caution. We have 61 wild barley accessions in common with  
639 Jones et al. (2008) (Table S3; Table S4). Thus, we are convinced that the lower number of 90  
640 haplotypes in our study is robust. More haplotypes described by Jones et al. (2008) probably  
641 result from issues with SNP calling and haplotype assignment. Nevertheless, recent studies  
642 (Cuesta-Marcos et al. 2010; Russell et al. 2016) reported also lower haplotype numbers at *PPD-*  
643 *H1* even from the larger-sequence lengths and diverse samples including wild barleys than  
644 Jones et al. (2008).

645 In our study we used comparative numbers of wild and domesticated barleys and comparatively  
646 smaller loss in genetic diversity was observed (Jakob et al. 2014). One reason could be that  
647 several major photoperiod responsive haplotypes are shared among wild and domesticated  
648 genotypes and that probably led to the observation of low nucleotide diversity change. One  
649 other reason could be that the domesticated group is a mix of spring, facultative and winter  
650 types, different row and caryopsis types and was collected from a wide range of environments.  
651 Thus, diversity (= expected heterozygosity on random mating) will be pushed higher in the  
652 domesticated group as a result of the winter – spring, 2-rowed – 6-rowed and other  
653 polymorphisms. There may be a general point that selection that maintains polymorphism  
654 within the domesticated group, as here, will also maintain diversity or at least reduce the loss.  
655 So, we get a reverse of the usual *pre- post-domestication* pattern with less loss than under  
656 neutrality. Nevertheless, overall, we observed fewer haplotypes ( $N=27$ ) in domesticated barley  
657 (landraces  $N=23$ ; cultivars:  $N=17$ ) compared to truly wild barley ( $N=71$ ).

658 Interestingly, recent investigation in sorghum using sequencing of the archaeological samples  
659 of wild and domesticated sorghum of different historical periods revealed that the surge in

660 diversity occurred over time and the formation of a domestication bottleneck is probably a myth  
661 (Smith et al. 2019; Brown 2019). We observed within wild and domesticated barleys segregating  
662 sites exclusive to either group. Segregating sites exclusive to the wild barley indicates that there  
663 are many mutations in wild barleys that were possibly not selected in domesticates. However,  
664 mutations exclusive to the domesticated barleys suggest that these mutations probably occurred  
665 after the initial domestication and/or outside the natural distribution range. Since wild and  
666 domesticated barleys can coexist together in the farmer's fields, natural gene flow may alter the  
667 values of genetic diversity. Such cases are reported to be relatively rare and are unlikely to be  
668 important in nature (Abdel-Ghani et al. 2004; Russell et al. 2011; Hübner et al. 2012). However,  
669 we believe that the rate of re-introgression of wild barley alleles probably occurred more  
670 frequently than previously thought.

671 To broaden the genetic basis for barley improvement at *PPD-H1*, haplotype information from  
672 this study could be considered. Potentially beneficial haplotypes could be introgressed from  
673 wild barley into the elite background (Dempewolf et al. 2017:  
674 <https://www.cwrdiversity.org/project/pre-breeding/>). Gene editing will provide another  
675 opportunity.

## 676 **5. Photoperiod non-responsiveness most likely originated post domestication and in the** 677 **Fertile Crescent**

678 Barley domestication history is complex. In recent years publications suggest multiple  
679 domestication events that led to the present domesticates (Kilian et al. 2006; Morrell and Clegg  
680 2007; Dai et al. 2012; Zeng et al. 2018; Pourkheirandish et al. 2015). One of the major events  
681 that led to the adaptation of barley to wider areas is the evolution of non-responsive barley (*ppd-*  
682 *H1*). Two contrasting hypotheses about the origin and spread of non-responsive barleys were  
683 published: (I) Turner et al. (2005) and Cockram et al. (2007) suggested that photoperiod non-  
684 responsiveness originated in domesticated barley (*'post' domestication, outside of the Fertile*  
685 *Crescent, during the spread of barley cultivation towards Northern Europe*); and (II) Jones et

686 al. (2008) concluded that the non-responsive phenotype originated in wild barley from Iran  
687 (*'pre' domestication*).

688 In our study we showed that the origin of photoperiod non-responsive haplotypes was derived  
689 from photoperiod responsive haplotype H10, and that the mutation leading to non-responsive  
690 types was only found in domesticated barley. Our combined data indicate a monophyletic  
691 natural mutation that most likely occurred in a domesticated *btr1Btr2*-type, 2-rowed, facultative  
692 barley in the Southern Levant (*'post domestication in the Fertile Crescent'*).

693 A likely scenario would be that a domesticated barley with a photoperiod responsive allele at  
694 *PPD-H1* e.g. H4, such as the Masada barley, hybridized with a Desert-type, facultative, wild  
695 barley harboring haplotype 10, in the Southern Levant, probably where H10 barley still grows  
696 today (Fig. 7). The fully fertile F1 hybrid would be a 'domesticated' barley harboring, for  
697 example, the *PPD-H1 – HvCEN* haplotype combination H10II or H10III. Their offspring would  
698 later receive the natural mutation at SNP22, also in the Southern Levant, probably under  
699 irrigated cultivation (if we assume that the non-responsive haplotype H1 would have negative  
700 effects on barley in this hot and dry region). In a second scenario, a domesticated *btr1Btr2*-type  
701 barley, which already contains H10 would directly receive the mutation at SNP22.

702 The ancient Masada sample is important in this context. Mascher et al. (2016) concluded that  
703 this 6000-year-old sample was a domesticated (*btr1Btr2*), 2-rowed and hulled barley. We found  
704 that it carried the *PPD-H1 – HvCEN* haplotype combination H4IV and was therefore  
705 photoperiod responsive (H4) and *'early flowering'* (IV). Interestingly, this haplotype  
706 combination was not found in the comprehensive collection of 2057 wild and domesticated  
707 barleys. The phylogenetically and phenotypically closest *PPD-H1 – HvCEN* haplotype  
708 combination found in the Diversity panel was H4II, and found in one wild barley from Turkey  
709 (Northern Levant, near Gaziantep); in four landraces (3x Libya, 1x Georgia) and in nine  
710 cultivars from six countries outside the Fertile Crescent (Table S4). At *HvCEN*, the progenitor

711 haplotype of IV is II, which was found in Israel in 8 wild barleys (also in the environmentally  
712 closest collection sites to Masada, Fig. 7); and in one landrace obtained from a market in  
713 Jerusalem in 1964. Haplotype 4 was found in Israel in 54 wild barley. Our data suggest that the  
714 Masada barley evolved from local populations in the Southern Levant and was not introduced  
715 from elsewhere.

716 The probable source of the Masada barley found in the Yoram Cave is located in the Ein Gedi  
717 oasis, about 17 km north of the cave (David 2015; Fig. 7). This is the largest and most important  
718 oasis in the Judean Desert with an annual water flow of about 3.5 million cubic meters. There,  
719 abundant archaeological remains attest for agricultural irrigation systems of agricultural  
720 terraces fed with spring water (Hadas 2012). Although the irrigation systems date to the Roman-  
721 Byzantine period (1st-6th century CE), the coexistence of nearby archaeological sites from the  
722 Chalcolithic period indicates that the spring was flowing at the same time. In addition, a review  
723 of historical sources attests to barley cultivation in this irrigation system during the Roman  
724 period (Hadas 2012). Considering this, the barley of the Yoram Cave was probably grown under  
725 irrigated conditions in the Ein Gedi oasis. Apparently, this is the only example of irrigated  
726 cereal fields in ancient Israel.

727 Similarly, the origin of non-responsive barley could have occurred under irrigated conditions  
728 in the Southern Levant. The mutation probably took place in domesticated barley but also a  
729 wild barley with H10 could have been mutated and then hybridized with a domesticated barley,  
730 under irrigated conditions in mixed stands.

731 Few photoperiod non-responsive haplotypes, but with a high frequency and found only in  
732 domesticated barley, indicate that they are probably of relatively recent origin. Although the  
733 6000-year-old Masada sample was photoperiod responsive, this does not exclude the possibility  
734 that the photoperiod non-responsiveness originated earlier than 6000 years ago or that  
735 photoperiod responsive and non-responsive domesticated barley co-existed in the Southern



736 Levant in the past as today (Table S4). Based on von Bothmer et al. (2003), “*Barley cultivation*  
737 *reached Spain ca. 7,000 years BP (Before Present), N Africa and Ethiopia ca. 8,000 years BP*  
738 *and northern Europe ca. 6,000 years BP.*” Further study is needed to shed more light on the  
739 age of non-responsive haplotypes.

#### 740 *Conclusion*

741 We showed that the photoperiod non-responsive adaptation to long day spring conditions in  
742 Europe originated from Desert type wild barley (H10) in the Judean desert and involved the  
743 selection of one *de novo* mutation (SNP22). Haplotypes H1 and H2 increased in frequency  
744 during the spread of civilization out of the Fertile Crescent towards Northern Europe under  
745 higher selection pressure. Haplotype H2 probably originated also *de novo* (synonymous  
746 substitution) during this range extension. Our data suggest that the spring growth habit evolved  
747 from the facultative habit in the Southern Levant. Finally, we conclude that all *btr1*-type barley  
748 evolved from Desert type wild barley near the Dead Sea.

#### 749 **Supplementary Material**

750 Supplementary material mentioned in the text, comprising 19 supplementary tables and 13  
751 supplementary figures are available online.

#### 752 **Sequence availability**

753 New sequence data from this article are deposited in GenBank Data library under accession  
754 numbers provided in Tables S12 and S13 (Supplementary Material online): KF309068-309171.

#### 755 **Acknowledgements**

756 We thank the following for providing seeds and/ or DNA material: Federal *ex situ* Genbank of  
757 Germany in Gatersleben (IPK), Germany; U.S. Department of Agriculture, Agricultural Service  
758 (USDA-ARS); International Center for Agricultural Research in Dry Areas (ICARDA); Max

759 Planck Institute for Plant Breeding Research (MPIPZ), Cologne, Germany; Australian Winter  
760 Cereals Collection, Tamworth, Australia; Institut für Pflanzenbau und Pflanzenzüchtung,  
761 Braunschweig, Germany; Aegean Agricultural Research Institute, Izmir, Turkey; Swedish  
762 University of Agricultural Sciences (SLU), Sweden; NPGBI-Karaj, Iran; Seed and Plant  
763 Improvement Institute (SPII), Karaj, Iran; the Exbardiv consortium; M. Abbasi, S. Michel, M.  
764 Ristow, M. von Korff, R. Fritsch, S. Jakob and F. Salamini. We thank Sigi Effgen, Jutta Schütze  
765 (both MPIPZ), Kerstin Wolf, Heike Harms, Birgit Dubsy, Christiane Kehler, Heloise Giraud,  
766 Peter Schreiber, Jürgen Marlow, Michael Grau (all IPK) and all gardeners and students involved  
767 for excellent technical support. The authors thank B. Steffenson, A. Tondelli, M. von Korff, M.  
768 Koorneef and F. Salamini for discussions. This work was supported by the German Research  
769 Foundation (DFG) Priority Program SPP1530 (FKZ KI 1465/6-1); the ERA-PG-funded project  
770 Exbardiv (<http://www.erapg.org>), GABI Future GENOBAR  
771 (<https://www.pflanzenforschung.de>), the Leibniz Institute of Plant Genetics and Crop Research  
772 (IPK), Gatersleben and the Max Planck Institute for Plant Breeding Research, Cologne.

## 773 **References**

- 774 Abdel-Ghani AH, Parzies HK, Omary A, Geiger HH. 2004. Estimating the outcrossing rate of  
775 barley landraces and wild barley populations collected from ecologically different  
776 regions of Jordan. *Theor Appl Genet.* 109:588–595.
- 777 Abdel-Ghani AH, Sharma R, Wabila C, Dhanagond S, Owais SJ, Duwayri MA, Al-Dalain  
778 SA, Klukas C, Chen D, Lübberstedt T, et al. 2019. Genome-wide association mapping in  
779 a diverse spring barley collection reveals the presence of QTL hotspots and candidate  
780 genes for root and shoot architecture traits at seedling stage. *BMC Plant Biol.* 19:216.
- 781 Afsharyan NP, Sannemann W, Léon J, Ballvora A. 2020. Effect of epistasis and environment  
782 on flowering time in barley reveals a novel flowering-delaying QTL allele. *J Exp Bot.*  
783 71:893–906.
- 784 Alizadeh A. 2003. Excavations at the prehistoric mound of Chogha Bonut, Khuzestan, Iran: S

- 785 Alqudah AM, Sharma R, Pasam RK, Graner A, Kilian B, Schnurbusch T. 2014. Genetic  
786 dissection of Photoperiod response based on GWAS of pre-anthesis phase duration in  
787 spring barley. *PLoS One* 9 (11)
- 788 Altschul SF, Gish W, Miller W, Myers EW, Lipman DJ. 1990. Basic local alignment search  
789 tool. *J Mol Biol.* 215:403–410.
- 790 Badr A, Muller K, Schafer-Pregl R, Rabey H El, Effgen S, Ibrahim HH, Pozzi C, Rohde W,  
791 Salamini F. 2000. On the origin and domestication history of Barley (*Hordeum vulgare*).  
792 *Mol Biol Evol.* 17:499-510.
- 793 Baloch AW, Baloch W, Baloch GA, Mangan B, et al. 2013. The effect of Ppd-H1 gene's SNP  
794 48 marker on heading dates in natural populations of barley from Middle East. *Global*  
795 *Journal of Biodiversity Science and Management* 3(2): 233-236.
- 796 Bandelt HJ, Forster P, Rohl A. 1999. Median-joining networks for inferring intraspecific  
797 phylogenies. *Mol Biol Evol* 16:37-48.
- 798 Bayer M, Rapazote-Flores P, Ganal M, Hedley PE, Macaulay M, Plieske J, Ramsay L, Russell  
799 J, Shaw PD, Thomas W, Waugh R. 2017. Development and evaluation of a barley 50k  
800 iSelect SNP array. *Front Plant Sci.* 8:1792
- 801 Brown TA. 2019. Is the domestication bottleneck a myth? *Nat Plants* 5:337–338.
- 802 Bustos-Korts D, Dawson IK, Russell J, Tondelli A, Guerra D, Ferrandi C, Strozzi F, Nicolazzi  
803 EL, Molnar-Lang M, Ozkan H, et al. 2019. Exome sequences and multi-environment  
804 field trials elucidate the genetic basis of adaptation in barley. *Plant J.* 99:1172–1191.
- 805 Campoli C, Drosse B, Searle I, Coupland G, Von Korff M. 2012. Functional characterisation  
806 of HvCO1, the barley (*Hordeum vulgare*) flowering time ortholog of CONSTANS. *Plant*  
807 *J.* 69:868–880.
- 808 Casas A, Djemel A, Ciudad F, Yahiaoui S, Ponce L, Contreras-Moreira B, Gracia MP, Lasa J,  
809 Igartua E. 2011. *HvFT1 (VrnH3)* drives latitudinal adaptation in Spanish barleys. *Theor*  
810 *Appl Genet.* 122:1293-1304.
- 811 Cockram J, Jones H, Leigh FJ, O'Sullivan D, Powell W, Laurie DA, Greenland AJ. 2007.  
812 Control of flowering time in temperate cereals: genes, domestication, and sustainable  
813 productivity. *J Exp Bot.* 58:1231-1244.
- 814 Comadran J, Kilian B, Russell J, et al. 2012. Natural variation in a homolog of *Antirrhinum*  
815 *CENTRORADIALIS* contributed to spring growth habit and environmental adaptation  
816 in cultivated barley. *Nat Genet.* 44:1388-1392.
- 817 Cuesta-Marcos A, Szucs P, Close TJ, Filichkin T, Muehlbauer GJ, Smith KP, Hayes PM. 2010.  
818 Genome-wide SNPs and re-sequencing of growth habit and inflorescence genes in

- 819           barley: Implications for association mapping in germplasm arrays varying in size and  
820           structure. *BMC Genomics* 11:707.
- 821   Dai F, Nevo E, Wu DZ, Comadran J, Zhou MX, Qiu L, Chen ZH, Beiles A, Chen GX, Zhang  
822           GP. 2012. Tibet is one of the centers of domestication of cultivated barley. *Proc Natl*  
823           *Acad Sci U S A*. 109:16969-16973.
- 824   Dawson IK, Russell J, Powell W, Steffenson B, Thomas WTB, Waugh R. 2015. Barley: A  
825           translational model for adaptation to climate change. *New Phytol*. 206:913–931.
- 826   Dempewolf H, Baute G, Anderson J, Kilian B, Smith C, Guarino L. 2017. Past and Future Use  
827           of Wild Relatives in Crop Breeding. *Crop Sci*. 57:1070-1082
- 828   Göransson M, Hallsson JH, Lillemo M, Orabi J, Backes G, Jahoor A, Hermannsson J,  
829           Christerson T, Tuveesson S, Gertsson B, et al. 2019. Identification of ideal allele  
830           combinations for the adaptation of spring barley to northern latitudes. *Front Plant Sci*.  
831           10:542.
- 832   Hadas G. 2012. Ancient agricultural irrigation systems in the oasis of Ein Gedi, Dead Sea, *Israel*  
833           *Journal of Arid Environments* 86 (2012) doi:10.1016/j.jaridenv.2011.08.015
- 834   Hall TA. 1999. BIOEDIT: a user-friendly biological sequence alignment editor and analysis  
835           program for Windows 95/98/ NT. *Nucleic Acids Symp. Ser*.
- 836   Harlan JR, de Wet MJM. 1971. Toward a rational classification of cultivated plants. *Taxon*  
837           20:509-517.
- 838   Haseneyer G, Stracke S, Paul C, Einfeldt C, Broda A, Piepho HP, Graner A, Geiger HH. 2010.  
839           Population structure and phenotypic variation of a spring barley world collection set up  
840           for association studies. *Plant Breeding*. 129:271-279.
- 841   Herzig P, Maurer A, Draba V, Sharma R, Draicchio F, Bull H, Milne L, Thomas WTB, Flavell  
842           AJ, Pillen K. 2018. Contrasting genetic regulation of plant development in wild barley  
843           grown in two european environments revealed by nested association mapping. *J Exp*  
844           *Bot*. 69:1517-1531.
- 845   Hijmans RJ, Cameron SE, Parra JL, Jones PG, Jarvis A. 2005. Very high resolution interpolated  
846           climate surfaces for global land areas. *Int J Climatol*. 25:1965–1978
- 847   Hübner S, Bdolach E, Ein-Gedy S, Schmid KJ, Korol A, Fridman E. 2013. Phenotypic  
848           landscapes: Phenological patterns in wild and cultivated barley. *J Evol Biol*. 26:163–174.
- 849   Hübner S, Höffken M, Oren E, Haseneyer G, Stein N, Graner A, Schmid K, Fridman E. 2009.  
850           Strong correlation of wild barley (*Hordeum spontaneum*) population structure with  
851           temperature and precipitation variation. *Mol Ecol*. 18:1523–1536.

- 852 Hübner S. et al. 2012. Islands and streams: clusters and gene flow in wild barley populations  
853 from the Levant. *Mol Ecol.* 21:1115–1129
- 854 Huson DH, Bryant D. 2006. Application of phylogenetic networks in evolutionary studies. *Mol*  
855 *Biol Evol.* 23:254-267.
- 856 Jakob SS, Rodder D, Engler JO, Shaaf S, Ozkan H, Blattner FR, Kilian B. 2014. Evolutionary  
857 history of wild barley (*Hordeum vulgare* subsp. *spontaneum*) analyzed using multilocus  
858 sequence data and paleodistribution modeling. *Genome Biol Evol.* 6:685–702.
- 859 Jones H, Leigh FJ, Mackay I, Bower MA, Smith LM, Charles MP, Jones G, Jones MK, Brown  
860 TA, Powell W. 2008. Population-based resequencing reveals that the flowering time  
861 adaptation of cultivated barley originated east of the Fertile Crescent. *Mol Biol Evol.*  
862 25:2211-2219.
- 863 Kikuchi R, Kawahigashi H, Ando T, Tonooka T, Handa H. 2009. Molecular and Functional  
864 Characterization of PEBP genes in barley reveal the diversification of their roles in  
865 flowering. *Plant Physiol.* 149:1341–1353.
- 866 Kilian B, Özkan H, Kohl J, Haseler AV, Barale F, Deusch O, Brandolini A, Yucel C, Martin  
867 W, Salamini F. 2006. Haplotype structure at seven barley genes: relevance to gene pool  
868 bottlenecks, phylogeny of ear type and site of barley domestication. *Mol Genet Genom.*  
869 276:230-241.
- 870 Lancashire PD, Bleiholder H, Boom T Van Den, Langeluddecke P, Stauss R, Weber E,  
871 Witzemberger A. 1991. A uniform decimal code for growth stages of crops and weeds.  
872 *Ann Appl Biol.* 119:561–601.
- 873 Li H. 2011. A statistical framework for SNP calling, mutation discovery, association mapping  
874 and population genetical parameter estimation from sequencing data. *Bioinformatics*  
875 27:2987–2993.
- 876 Librado P, Rozas J. 2009. DnaSP v5: a software for comprehensive analysis of DNA  
877 polymorphism data. *Bioinformatics* 25:1451-1452.
- 878 Long NV, Dolstra O, Malosetti M, Kilian B, Graner A, Visser RGF, van der Linden CG.  
879 2013. Association mapping of salt tolerance in barley (*Hordeum vulgare* L.). *Theor Appl*  
880 *Genet.* 126:2335–2351.
- 881 Mascher M, Gundlach H, Himmelbach A, Beier S, Twardziok SO, Wicker T, Radchuk V,  
882 Dockter C, Hedley PE, Russell J, et al. 2017. A chromosome conformation capture  
883 ordered sequence of the barley genome. *Nature* 544:427–433.

- 884 Mascher M, Schuenemann VJ, Davidovich U, Marom N, Himmelbach A, Hübner S, Korol A,  
885 David M, Reiter E, Riehl S, et al. 2016. Genomic analysis of 6,000-year-old cultivated  
886 grain illuminates the domestication history of barley. *Nat Genet.* 48:1089-1093.
- 887 Maurer A, Draba V, Jiang Y, Schnaithmann F, Sharma R, Schumann E, Kilian B, Reif JC,  
888 Pillen K (2015) Modelling the genetic architecture of flowering time control in barley  
889 through nested association mapping. *BMC Genomics* 16 10.1186/s12864-015-1459-7.
- 890 McMaster GS, Moragues M. 2019. Crop development related to temperature and photoperiod.  
891 In: Savin R., Slafer G. (eds) Crop Science. Encyclopedia of Sustainability Science and  
892 Technology Series. Springer, New York, NY.
- 893 Monat C, Padmarasu S, Lux T, Wicker T, Gundlach H, Himmelbach A, Ens J, Li C,  
894 Muehlbauer GJ, Schulman AH, et al. 2019. TRITEX: Chromosome-scale sequence  
895 assembly of Triticeae genomes with open-source tools. *Genome Biol.* 20:284.
- 896 Monteagudo A, Igartua E, Contreras-Moreira B, Gracia MP, Ramos J, Karsai I, Casas AM.  
897 2019. Fine-tuning of the flowering time control in winter barley: The importance of  
898 HvOS2 and HvVRN2 in non-inductive conditions. *BMC Plant Biol.* 19:113.
- 899 Morrell PL, Clegg MT. 2007. Genetic evidence for a second domestication of barley (*Hordeum*  
900 *vulgare*) east of the Fertile Crescent. *Proc Natl Acad Sci U S A.* 104:3289-3294.
- 901 Nitcher R, Distelfeld A, Tan C, Yan L, Dubcovsky J. 2013. Increased copy number at the  
902 *HvFT1* locus is associated with accelerated flowering time in barley. *Molecular*  
903 *Genetics Genomics* 288:261-275.
- 904 Pasam RK, Sharma R, Walther A, Özkan H, Graner A, Kilian B. 2014. Genetic diversity and  
905 population structure in a legacy collection of spring barley landraces adapted to a wide  
906 range of climates. *PLoS One* 9:1–29.
- 907 Pasam, RK, Sharma R, Malosetti M, van Eeuwijk FA, Haseneyer G, Kilian B, Graner A. 2012.  
908 Genome-wide association studies for agronomical traits in a world wide spring barley  
909 collection. *BMC Plant Biol* 12:16.
- 910 Piperno DR, Weiss E, Holst I, Nadel D. 2004. Processing of wild cereal grains in the Upper  
911 Palaeolithic revealed by starch grain analysis. *Nature* 430:670–673.
- 912 Pourkheirandish M, Hensel G, Kilian B, Senthil N, Chen G, Sameri M, Azhaguvel P, Sakuma  
913 S, Dhanagond S, Sharma R, et al. 2015. Evolution of the Grain Dispersal System in  
914 Barley. *Cell* 162:527–539.
- 915 Qian C, Yan X, Shi Y, Yin H, Chang Y, Chen J, Ingvarsson PK, Nevo E, Ma XF. 2020.  
916 Adaptive signals of flowering time pathways in wild barley from Israel over 28  
917 generations. *Heredity* 124:62–76.



- 918 R Core Team. 2018. A Language and Environment for Statistical Computing. R Found. Stat.  
919 Comput.
- 920 Renaud G, Stenzel U, Kelso J. 2014. LeeHom: Adaptor trimming and merging for Illumina  
921 sequencing reads. *Nucleic Acids Res.* 42:e141.
- 922 Russell J, Mascher M, Dawson IK, Kyriakidis S, Calixto C, Freund F, Bayer M, Milne I,  
923 Marshall-Griffiths T, Heinen S, et al. 2016. Exome sequencing of geographically diverse  
924 barley landraces and wild relatives gives insights into environmental adaptation. *Nat*  
925 *Genet.* 48:1024–1030.
- 926 Saisho D, Ishii M, Hori K, Sato K. 2011. Natural variation of barley vernalization requirements:  
927 implication of quantitative variation of winter growth habit as an adaptive trait in East  
928 Asia. *Plant Cell Physiol.* 52:775-784.
- 929 Sharma R, Draicchio F, Bull H, Herzig P, Maurer A, Pillen K, Thomas W, Flavell AJ. 2018.  
930 Genome-wide association of yield traits in a nested association mapping population of  
931 barley reveals new gene diversity for future breeding. *J Exp Bot.* 69:3811–3822.
- 932 Smith O, Nicholson W V., Kistler L, Mace E, Clapham A, Rose P, Stevens C, Ware R,  
933 Samavedam S, Barker G, et al. 2019. A domestication history of dynamic adaptation and  
934 genomic deterioration in Sorghum. *Nat Plants* 5:369–379.
- 935 Snir A, Nadel D, Groman-Yaroslavski I, Melamed Y, Sternberg M, Bar-Yosef O, Weiss E.  
936 2015. The origin of cultivation and proto-weeds, long before neolithic farming. *PLoS*  
937 *One* 10:1–12.
- 938 Steffen A, Fischer A, Staiger D. 2014. Determination of photoperiodic flowering time control  
939 in Arabidopsis and barley. In: *Methods in Molecular Biology.* p. 285–295.
- 940 Stracke S, Haseneyer G, Veyrieras JB, Geiger H, Sauer S, Graner A, Piepho HP. 2009.  
941 Association mapping reveals gene action and interactions in the determination of  
942 flowering time in barley. *Theor Appl Genet.* 118:259-273.
- 943 Takahashi R, Hayashi J, Yasuda S, Hiura U. 1963. Characteristics of the wild and cultivated  
944 barleys from Afghanistan and its neighboring regions. *Ber. Ohara Inst. Landw Biol.,*  
945 *Okayama Univ.* 12:1-23.
- 946 Tenaillon MI, U'Ren J, Tenaillon O, Gaut BS. 2004. Selection versus demography: A  
947 multilocus investigation of the domestication process in Maize. *Mol Biol Evol.* 21:1214–  
948 1225.
- 949 Tondelli A, Xu X, Moragues M, Sharma R, Schnaithmann F, Ingvaridsen C, Manninen O,  
950 Comadran J, Russell J, Waugh R, et al. 2013. Structural and temporal variation in genetic  
951 diversity of European spring two-row barley cultivars and association mapping of



952 quantitative traits. *Plant Genome* 6:1–14.

953 Turner A, Beales J, Faure S, Dunford RP, Laurie DA. 2005. The pseudo-response regulator  
954 *Ppd-H1* provides adaptation to photoperiod in barley. *Science* 310:1031-1034.

955 von Bothmer, R, Sato K, Komatsuda T, Yasuda SFG. 2003. The domestication of cultivated  
956 barley. In: R. von Bothmer, Th. van Hintum, H. Knüpfper and K. Sato (eds), Diversity  
957 in Barley (*Hordeum vulgare*). In: TvH Roland von Bothmer, Helmut Knüpfper and  
958 Kazuhiro Sato, editor. Diversity in Barley (*Hordeum vulgare*): Elsevier B.V. p. 9-27.

959 Weiss E, Wetterstrom W, Nadel D, Bar-Yosef O. 2004. The broad spectrum revisited:  
960 Evidence from plant remains. *Proc Natl Acad Sci U S A*. 101:9551–9555.

961 Wiegmann M, Maurer A, Pham A, March TJ, Al-Abdallat A, Thomas WTB, Bull HJ, Shahid  
962 M, Eglinton J, Baum M, Flavell AJ, Tester M, Pillen K. 2019. Barley yield formation  
963 under abiotic stress depends on the interplay between flowering time genes and  
964 environmental cues. *Sci Rep* 9:6397 <https://doi.org/10.1038/s41598-019-42673-1>

965 Xu X, Sharma R, Tondelli A, Russell J, Comadran J, Schnaithmann F, Pillen K, Kilian B,  
966 Cattivelli L, Thomas WTB, et al. 2018. Genome-Wide Association Analysis of Grain  
967 Yield-Associated Traits in a Pan-European Barley Cultivar Collection. *Plant Genome*  
968 11:170073

969 Zeng X, Guo Y, Xu Q, Mascher M, Guo G, Li Shuaicheng, Mao L, Liu Q, Xia Z, Zhou J, et  
970 al. 2018. Origin and evolution of qingke barley in Tibet. *Nat Commun*. 9:5433.

971 Zohary et al. 2013. Domestication of Plants in the Old World; Fourth Edition: Oxford Univ.  
972 Press, Oxford.

973

974 **Figure legends**

975 **Fig. 1:** Phenotypic distribution of days to heading (Hd) over four multi-location field trials.  
976 Violin plots of Hd (in days) across locations.

977 **Fig. 2:** Manhattan plots of days to heading (Hd) from four trial sites are displayed. The  
978 horizontal red line shows the significance threshold based on  $-\log_{10}P=4.0$ . (a) Germany; (b)  
979 USA; (c) Turkey; (d) Syria. Important co-localized candidate genes are indicated.

980 **Fig. 3:** Schematic overview of *PPD-H1* gene structure and SNPs. (a) The *PPD-H1* gene  
981 consists of 8 exons. Conserved domains are indicated (Pseudo-receiver and CCT). SNP  
982 positions are shown. The 50K SNP chip physical positions are given as in Bayer et al. (2017).  
983 Details are provided in Table S7; bold=significant SNPs). The locations of SNP22 and SNP48  
984 are indicated. Primer-binding sites are shown by arrows (P5F + P5R; PP05 + PP04). (b) SNPs  
985 based on re-sequencing at *PPD-H1* in the GWAS panel and corresponding haplotypes (and  
986 their frequencies in brackets) are provided.

987 **Fig. 4:** Comparison of phenotypic response (in days to heading at BBCH55) to photoperiod for  
988 41 genotypes grown under long and short-day conditions. Differences in HD under long and  
989 short conditions are smaller for non-responsive (*ppd-H1*) genotypes compared to photoperiod  
990 responsive (*Ppd-H1*) genotypes. This provides evidence that haplotype H10 containing  
991 genotypes are photoperiod responsive. Boxplots are based on phenotypic BLUEs of genotypes.

992 **Fig. 5:** Allele mining at *PPD-H1*. Median-joining network derived from re-sequenced DNA  
993 haplotypes of 2057 geo-referenced barley genotypes. 90 haplotypes were found and are  
994 represented by arbitrarily given roman numerals. Circle sizes correspond to the frequency of  
995 that particular haplotype. Red, haplotype found in wild barley; dark blue, domesticated barley;  
996 yellow, *H. vulgare agriocrithon*. Distance in bp between haplotypes is indicated by Arabic  
997 numerals and visible at higher magnification. Eight haplotypes were shared among wild and

998 domesticated barleys. Photoperiod non-responsive (*ppd-H1*) haplotypes (H1, H2, H47, H55 and  
999 H56) are indicated. Black dots indicate median vectors. Numbers within circles correspond to  
1000 the number of individuals carrying that haplotype.

1001 **Fig. 6:** Principal component analysis (PCA) biplot of bioclimatic variables for collection sites  
1002 of 1375 genotypes (942 wild and 432 landrace barleys, and the Masada sample). **a)** non-  
1003 responsive (H1, H2) and responsive groups are separated. Two groups of H2 collection sites  
1004 are visible. H10.Wild.Israel: wild barley from Israel containing haplotype; H10.Wild.Iran: wild  
1005 barley from Iran containing haplotype 10. **b)** collection site characteristics of non-responsive  
1006 barley (.NE – landraces from the Near East) and H4 containing landrace barley are highlighted.  
1007 **c)** Zooming in on the characteristics of the collection sites of extant wild barley from Israel  
1008 compared to the collection sites of the Masada sample and landraces containing H4. Wild barley  
1009 yieldcontaining six haplotypes are indicated. Large circles indicate the median PC projection  
1010 for each haplotype. See Tables S16, S17 and Figure S9 for more information.

1011 **Fig. 7:** Distribution of *PPD-H1* haplotype 10 in wild barley from Israel, relevant excavation  
1012 sites, and the environmentally closest collections sites to Masada. **a)** haplotype 10 collection  
1013 sites are indicated by black dots. **b)** **Red dot** – Kidron stream, the environmentally overall most  
1014 similar collection site of extant wild barley to Masada. FT643 the closest wild barley to *btr1*  
1015 based on Pourkheirandish et al. (2015) was collected here; **Green dot** – Almog, the  
1016 environmentally second closest and also the closest *PPD-H1* haplotype 10 collection site to  
1017 Masada; **Blue dot** – Neomi, the environmentally third closest collection site to Masada. FT013,  
1018 FT015 and FT016 from this collection site were also among the closest wild barleys to *btr1*.  
1019 Star – location of Jerusalem; yellow triangles – excavation sites (Ohalo II, Masada, Ein Gedi).  
1020 See Tables S4, S18).

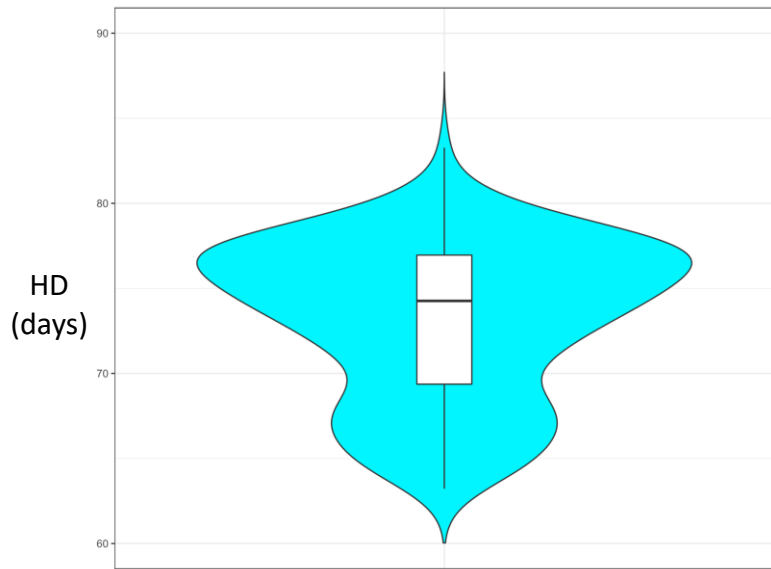

Germany

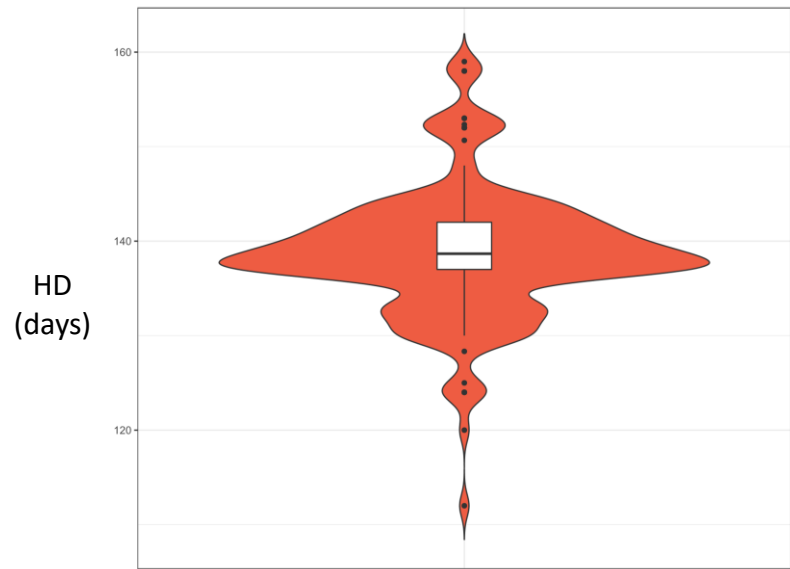

Turkey

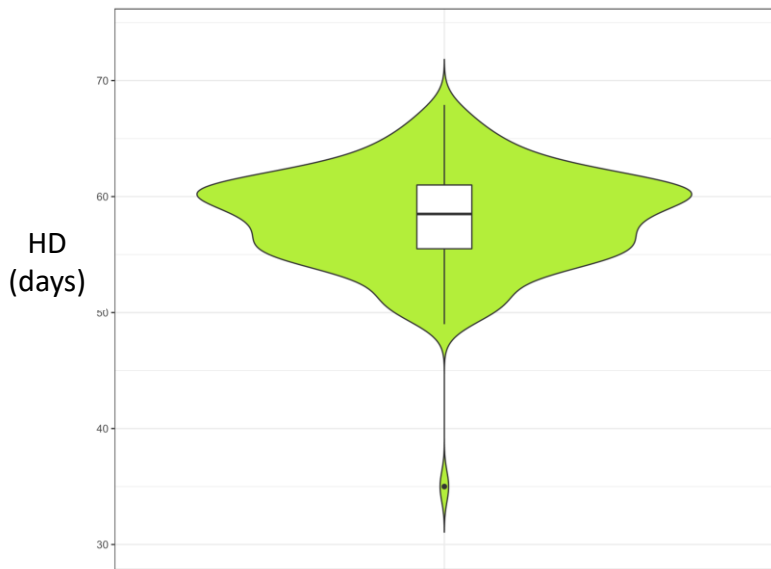

USA

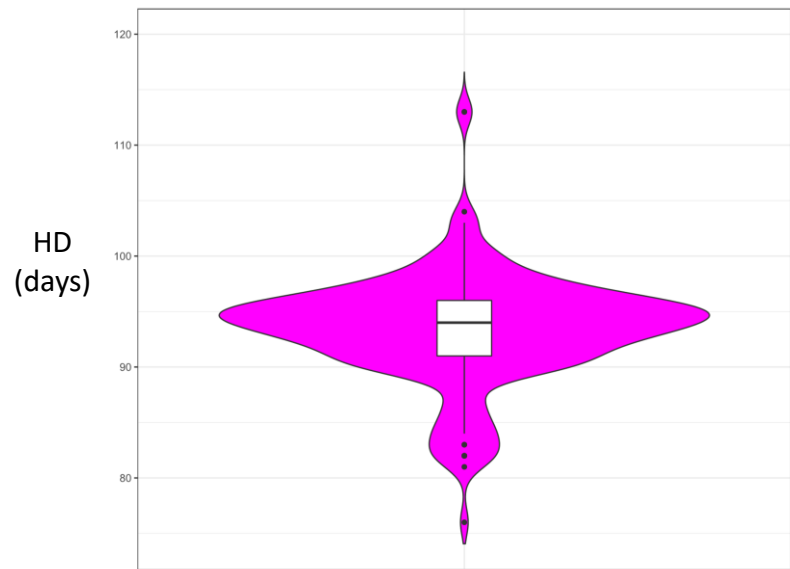

Syria

(a)

Germany

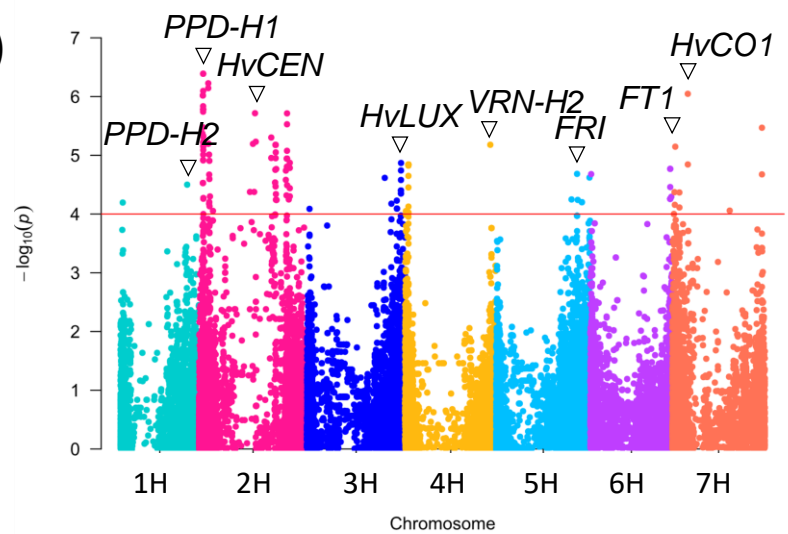

(b)

USA

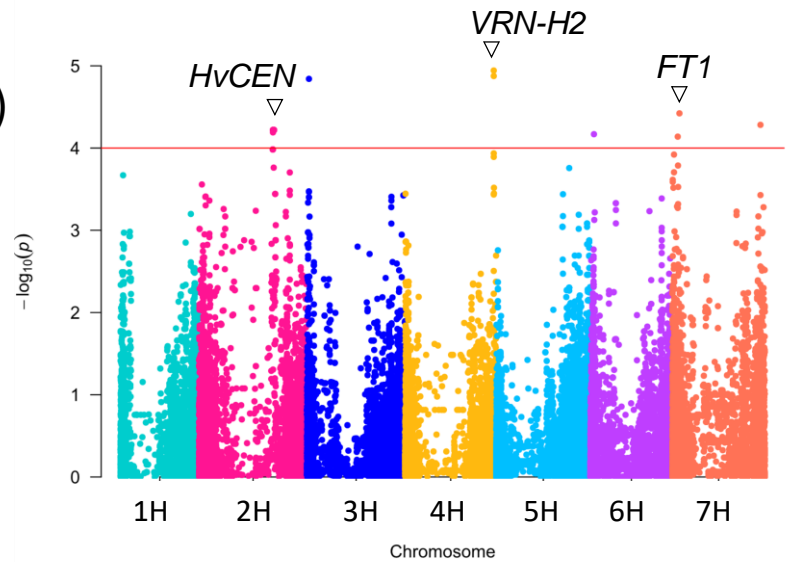

(c)

Turkey

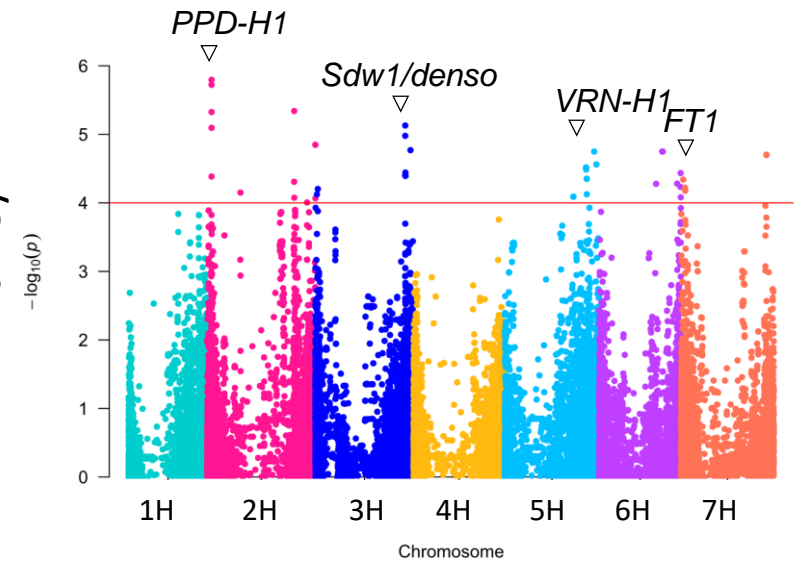

(d)

Syria

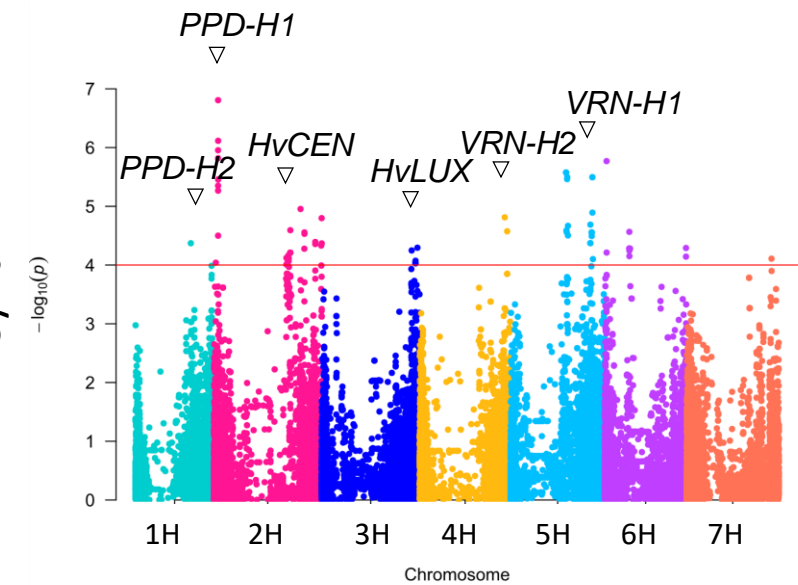

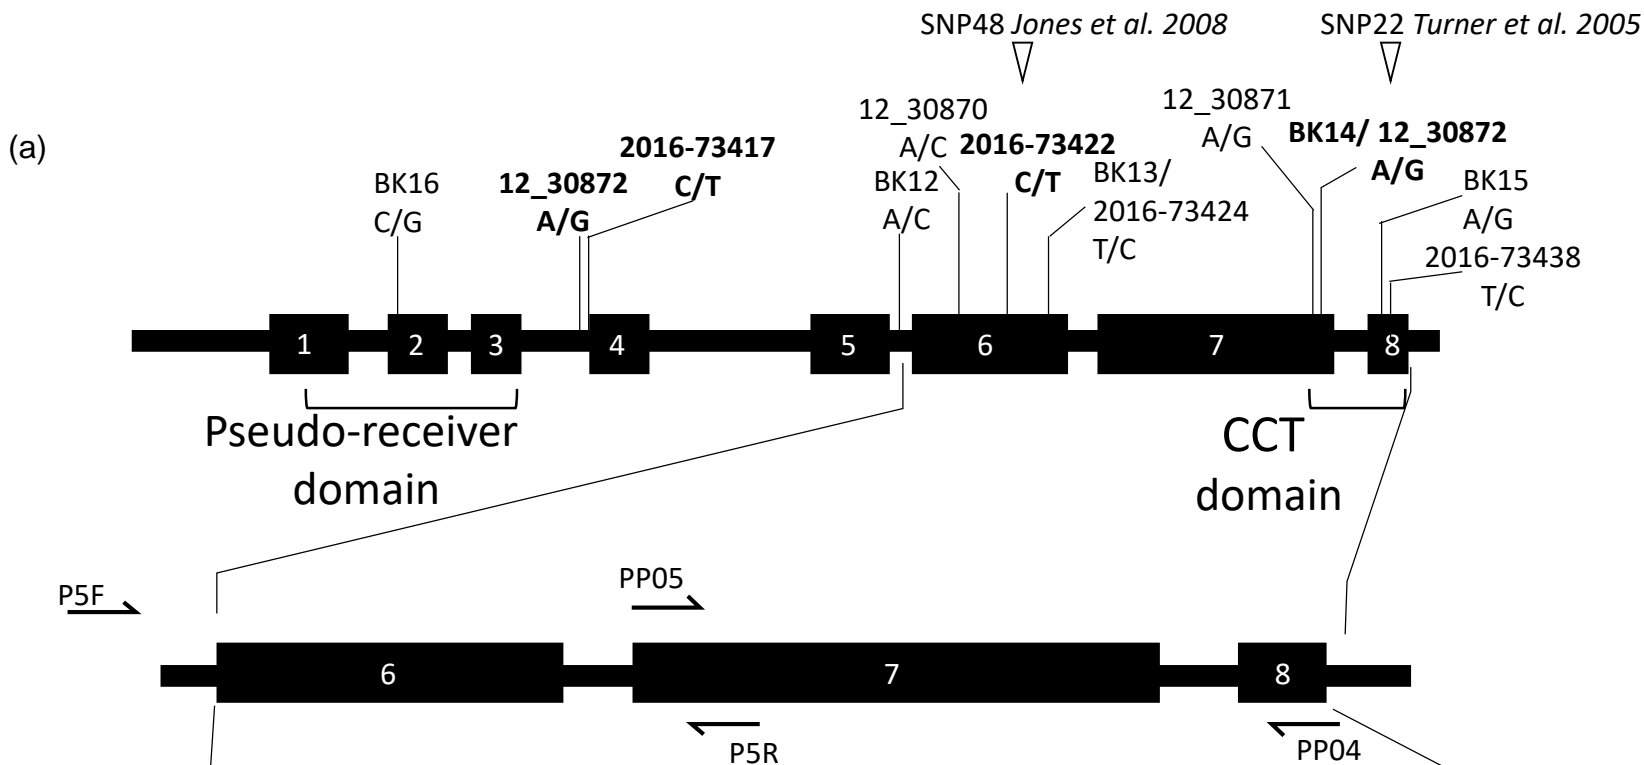

(b)

| Haplotype  | 74 | 78 | 126 | 267 | 270 | 271 | 465 | 533 | 557 | 562 | 575 | 592 | 727 | 737 | 759 | 760 | 778 | 829 | 830 | 831 | 940 | 959 | 1040 | 1292 | 1295 | 1322 | 1355 |
|------------|----|----|-----|-----|-----|-----|-----|-----|-----|-----|-----|-----|-----|-----|-----|-----|-----|-----|-----|-----|-----|-----|------|------|------|------|------|
| H2 (N=80)  | C  | C  | G   | G   | G   | T   | C   | G   | T   | C   | T   | G   | T   | C   | C   | G   | C   | -   | -   | -   | G   | A   | G    | C    | C    | T    | A    |
| H1 (N=49)  | C  | C  | G   | G   | G   | T   | C   | G   | T   | C   | T   | G   | G   | C   | C   | G   | C   | -   | -   | -   | G   | A   | G    | C    | C    | T    | A    |
| H56 (N=1)  | C  | C  | G   | G   | G   | T   | C   | A   | T   | C   | T   | G   | G   | C   | C   | G   | C   | -   | -   | -   | G   | A   | G    | C    | C    | T    | A    |
| H10 (N=2)  | C  | C  | G   | G   | G   | T   | C   | G   | T   | C   | T   | G   | G   | C   | C   | G   | C   | -   | -   | -   | G   | A   | G    | C    | C    | G    | A    |
| H7a (N=19) | C  | C  | G   | A   | G   | C   | T   | G   | T   | C   | T   | G   | G   | C   | C   | G   | T   | -   | -   | -   | G   | G   | G    | C    | C    | G    | G    |
| H7b (N=11) | C  | C  | G   | A   | G   | C   | C   | G   | T   | C   | T   | G   | G   | C   | C   | G   | T   | -   | -   | -   | G   | G   | G    | C    | C    | G    | G    |
| H4a (N=13) | C  | A  | C   | A   | G   | C   | C   | G   | T   | C   | T   | A   | G   | C   | C   | G   | C   | -   | -   | -   | G   | G   | A    | C    | C    | G    | G    |
| H4b (N=1)  | C  | A  | G   | A   | G   | C   | C   | G   | T   | C   | T   | A   | G   | C   | C   | G   | C   | -   | -   | -   | G   | G   | A    | C    | C    | G    | G    |
| H8 (N=17)  | C  | C  | G   | A   | G   | C   | T   | G   | T   | C   | T   | G   | G   | T   | C   | G   | T   | -   | -   | -   | G   | G   | G    | C    | C    | G    | G    |
| H3 (N=15)  | C  | A  | G   | A   | G   | C   | C   | G   | T   | C   | T   | A   | G   | C   | C   | A   | C   | -   | -   | -   | G   | G   | A    | C    | T    | G    | G    |
| H9 (N=2)   | C  | C  | G   | A   | G   | C   | C   | G   | T   | C   | C   | G   | G   | C   | C   | G   | T   | -   | -   | -   | G   | G   | G    | C    | C    | G    | G    |
| H6a (N=12) | C  | C  | G   | A   | G   | C   | T   | G   | C   | T   | T   | A   | G   | C   | G   | G   | C   | A   | G   | C   | A   | G   | G    | C    | C    | G    | G    |
| H6b (N=1)  | T  | C  | G   | A   | A   | C   | T   | G   | C   | T   | T   | A   | G   | C   | G   | G   | C   | A   | G   | C   | A   | G   | G    | C    | C    | G    | G    |
| H94 (N=1)  | C  | C  | G   | A   | G   | C   | T   | G   | C   | T   | T   | A   | G   | C   | G   | G   | C   | A   | G   | C   | A   | G   | G    | C    | C    | G    | G    |

△
△

*SNP48 Jones et al. 2008*
*SNP22 Turner et al. 2005*

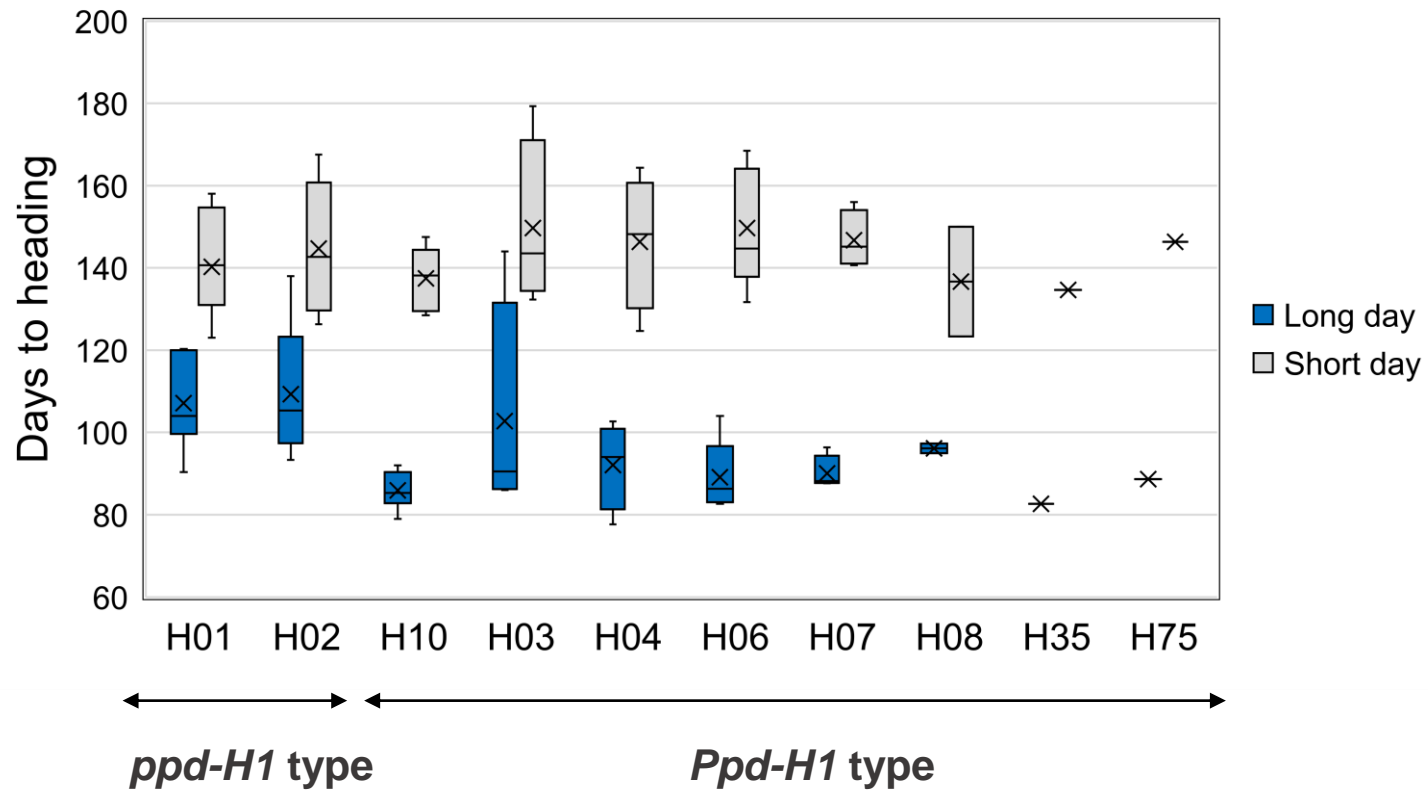



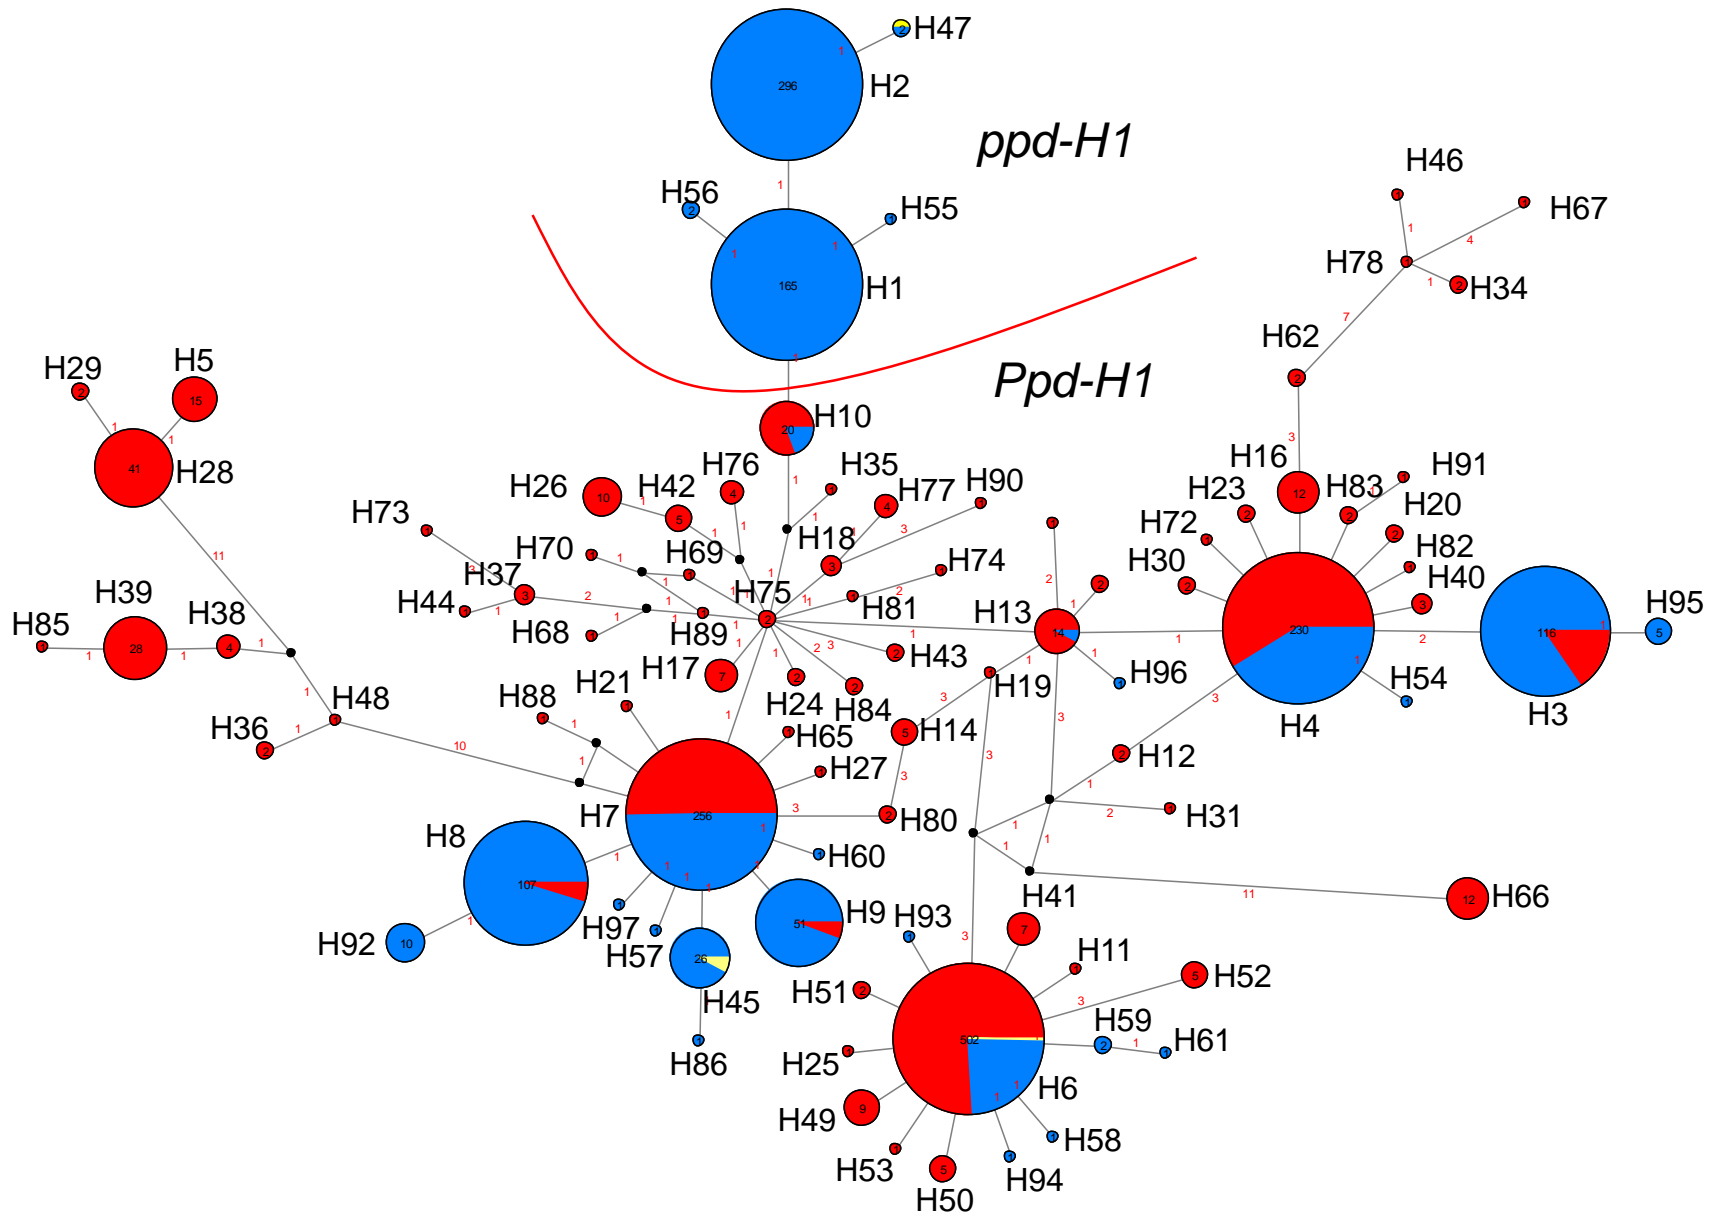

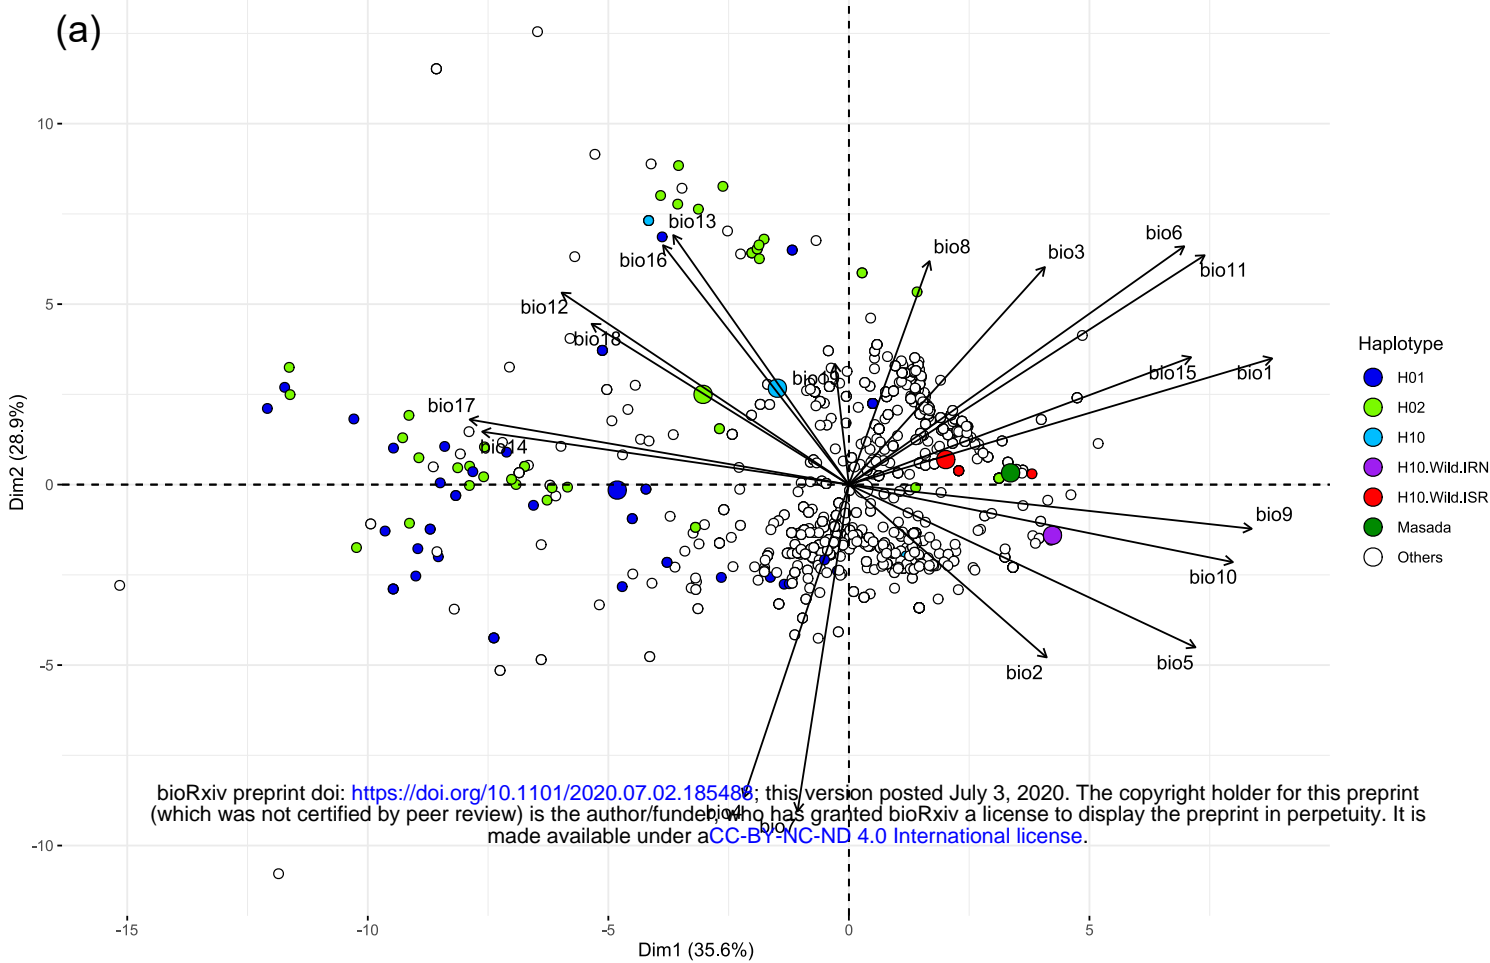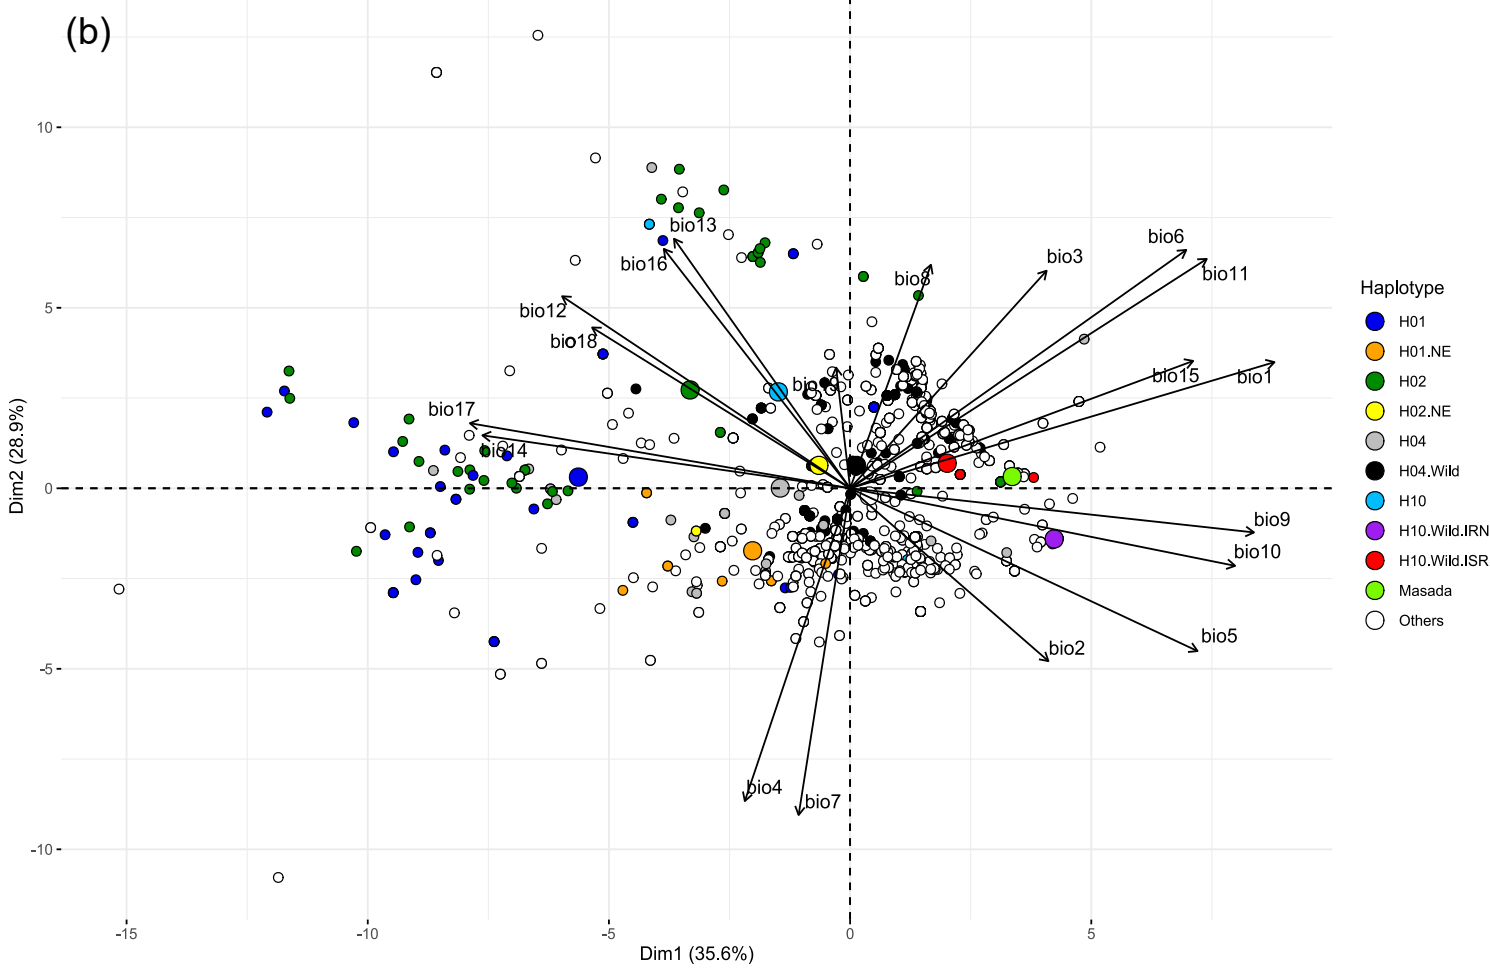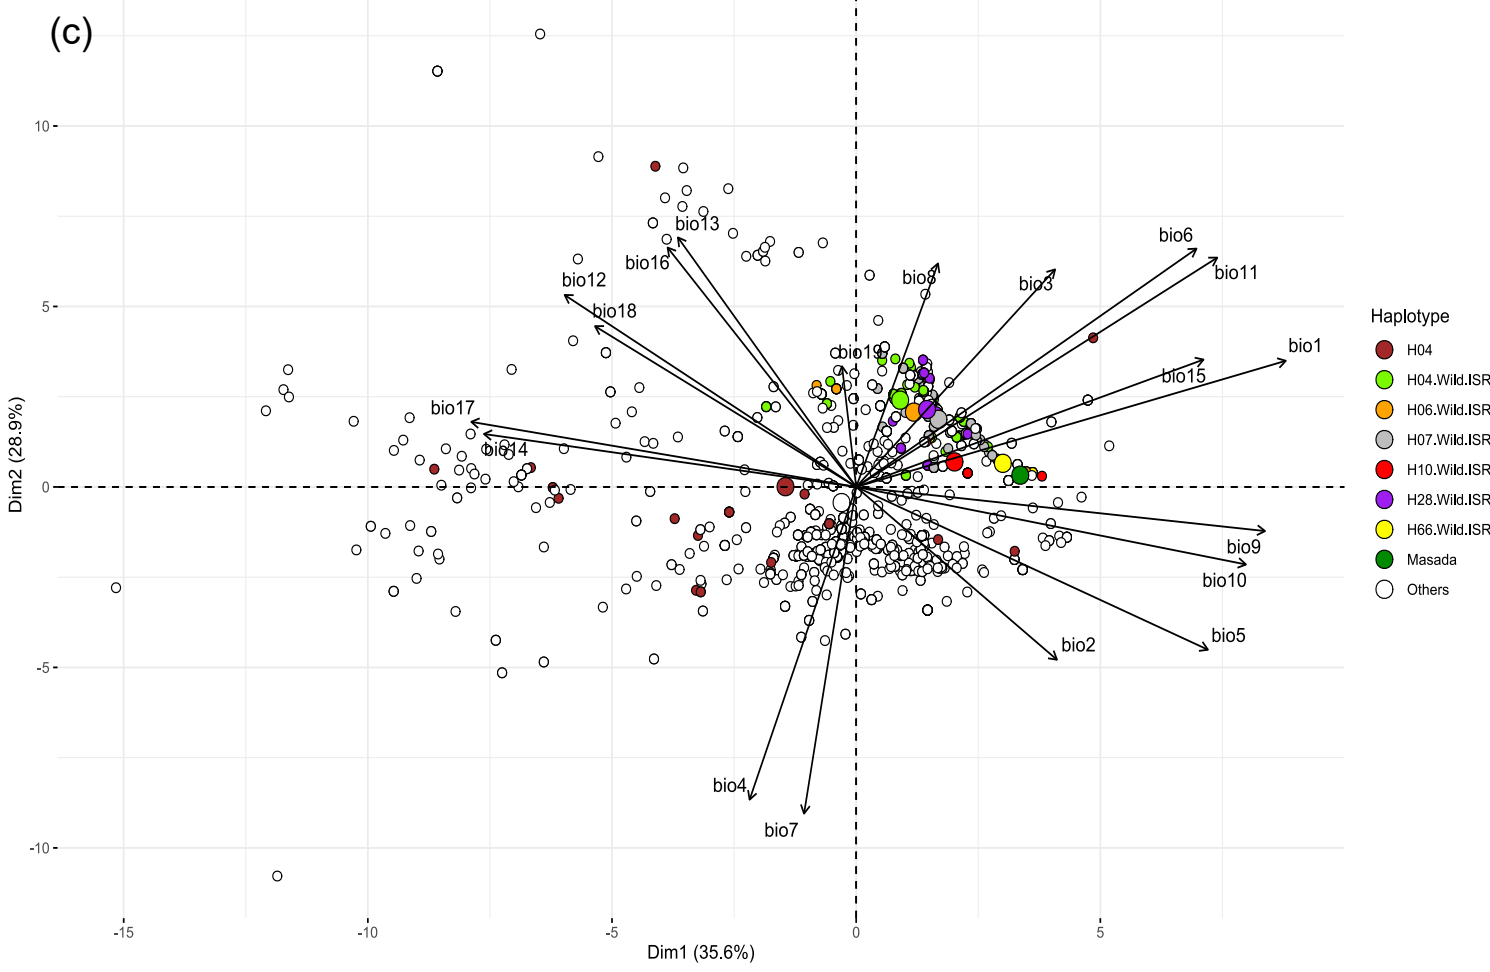

**a)**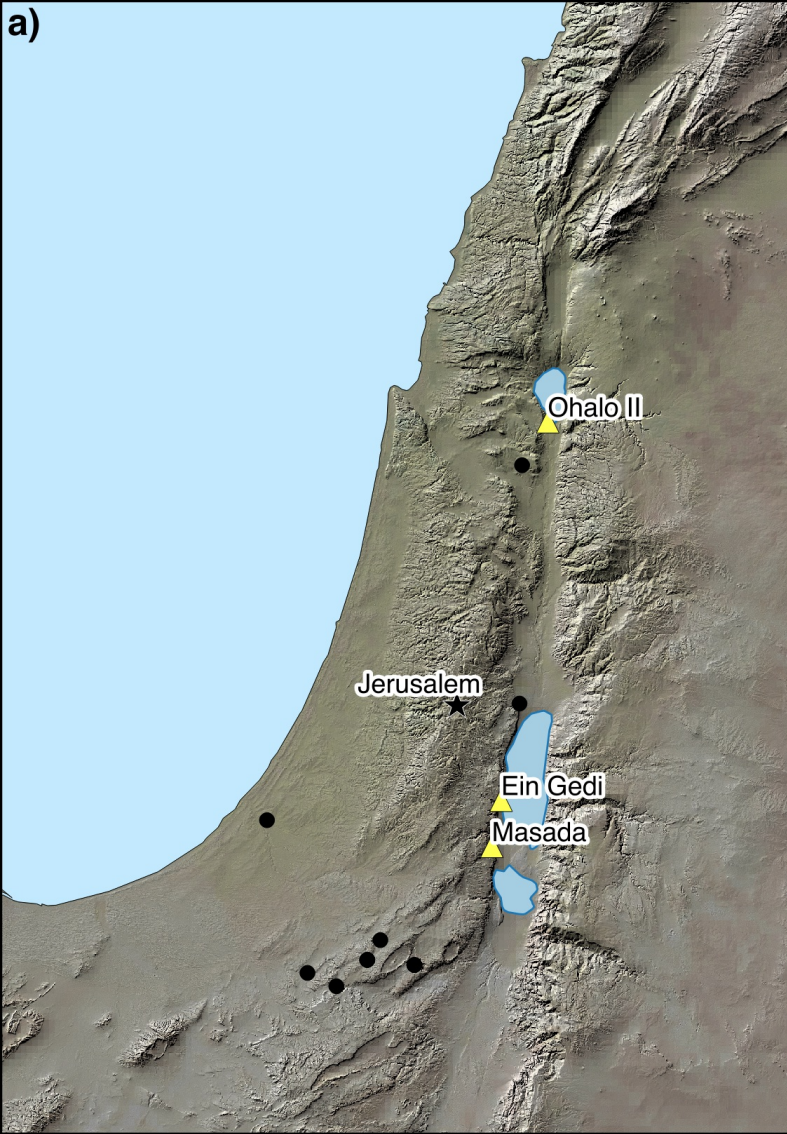**b)**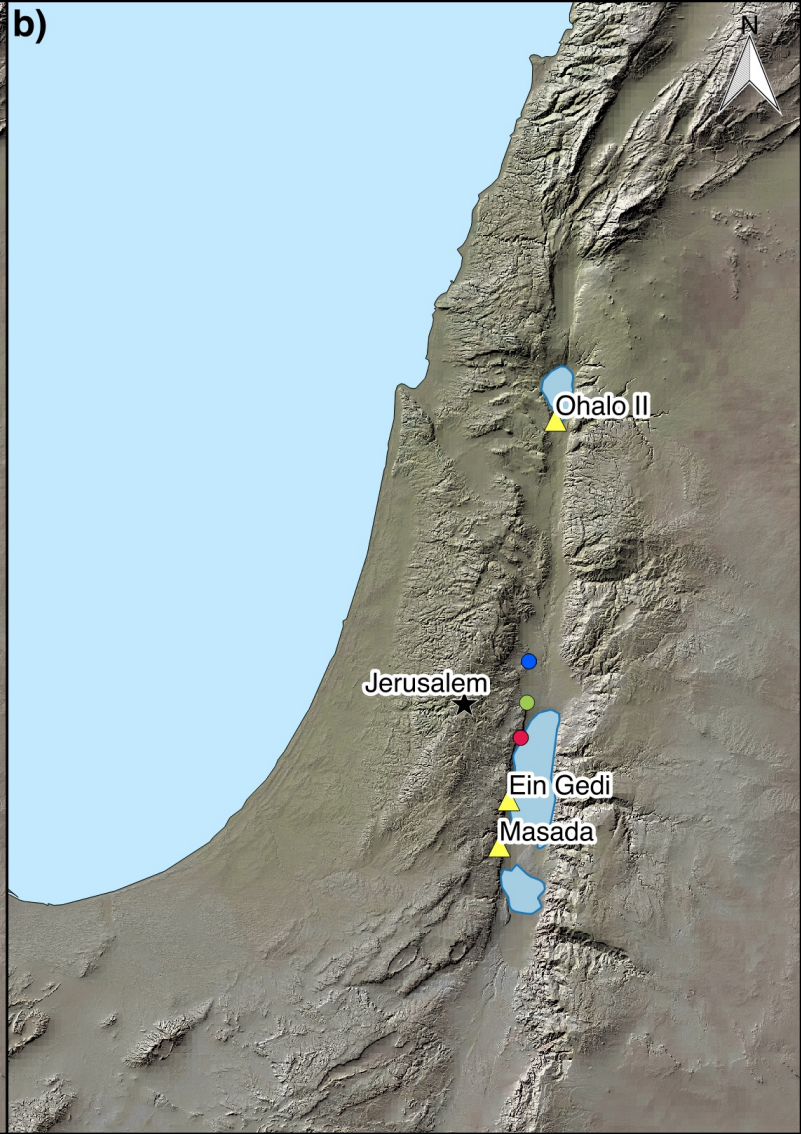

Source: http://biorxiv.org/content/10.1101/2020.07.02.185488v1.full.pdf
